# Supplementary material for: Melting over the East Antarctic Peninsula (1999–2009): evaluation of a high-resolution regional climate model
Source: Copernicus journal article supplement (doi:10.5194/tc-2017-253), 2017-12-22
Supplement: Supplementary file [file tc-2017-253-AC7-supplement.pdf]

# Melting over the Northeast Antarctic Peninsula (1999-2009): evaluation of a high-resolution regional climate model

Rajashree T. Datta<sup>1</sup>, Marco Tedesco<sup>2</sup>, Cecile Agosta<sup>3</sup>, Xavier Fettweis<sup>3</sup>, Peter Kuipers Munneke<sup>4</sup>,  
Michiel R. van den Broeke.<sup>4</sup>

<sup>1</sup>The Graduate Center, City University of New York, NY 10016, USA

<sup>2</sup>Lamont-Doherty Earth Observatory of Columbia University, Palisades, New York, New York 10964, USA

<sup>3</sup>Department of Geography, Université de Liège, Liège, Belgium

<sup>4</sup>Institute for Marine and Atmospheric Research, Utrecht University, Utrecht, The Netherlands

*Correspondence to:* Rajashree Tri Datta (Tri.Datta@gmail.com)

**Abstract.** Surface melting over the Antarctic Peninsula (AP) may impact the stability of ice shelves and therefore the rate at which grounded ice is discharged into the ocean. Energy and mass balance models are needed to understand how climatic change and atmospheric circulation variability drive current and future melting. In this study, we evaluate the regional climate model MAR over the AP at a 10 km horizontal spatial resolution between 1999 and 2009, a period when active microwave data from the QuikSCAT mission is available. This is the first time that this model, which has been validated extensively over Greenland, has been applied to the AP at a high resolution and for a relatively long time period (full outputs are available to 2014). We find that melting in the northeastern AP, the focus area of this study, can be initiated both by sporadic westerly föhn flow over the AP mountains and by northerly winds advecting warm air from lower latitudes. A comparison of MAR with satellite and automatic weather station (AWS) data reveals that satellite estimates show greater melt frequency, a larger melt extent, and a quicker expansion to peak melt extent than MAR in the center and east of the Larsen C ice shelf. These differences are reduced in the north and west of the ice shelf, where the comparison with satellite data suggests that MAR is accurately capturing melt produced by warm westerly winds. MAR shows an overall warm bias and a cool bias at temperatures above 0°C as well as fewer warm, strong westerly winds than reported by AWS stations located on the eastern edge of the Larsen C ice shelf, suggesting that the underestimation of melt in this region may be the product of limited eastward flow. At higher resolutions (5km), MAR shows a further increase in wind biases and a decrease in meltwater production. We conclude that non-hydrostatic models at spatial resolutions better than 5km are needed to better-resolve the effects of föhn winds on the eastern edges of the Larsen C ice shelf.

## 1 Introduction

Increased meltwater production over the Antarctic Peninsula (AP) in the latter half of the 20<sup>th</sup> century has been linked to a warming atmosphere, with potential implications for future sea-level rise (Barrand et al., 2013; Turner et al., 2005; Vaughan, 2006). Surface melting has been implicated in the weakening and eventual collapse of ice shelves as well as the subsequent acceleration of contributing glaciers, with the Larsen A (1995) and Larsen B (2002) on the eastern

1 AP as the most notable examples (Vaughan et al, 1996; Rott et al, 1998; Scambos, 2004). In July 2017, a rift on the  
2 Larsen C Ice Shelf, which had been expanding for several years, resulted in the calving of the 5800 km<sup>2</sup> iceberg A68  
3 (Hogg and Godmundsson, 2017).

4 Surface melting influences ice shelf stability through the stress produced by meltwater ponding as well as  
5 meltwater percolation through firn. One proposed mechanism for the disintegration of ice shelves hypothesizes that  
6 surface meltwater infills and deepens pre-existing crevasses, through a process called hydrofracture (Scambos et al.,  
7 2000; Weertman, 1973; van der Veen et al., 1997). In addition, a complementary mechanism proposes that when  
8 supraglacial lakes drain (becoming dolines), an upward flexure is induced which can weaken an ice shelf, both at the  
9 surface and at the base (MacAyeal and Sergienko, 2013). Large open-rift systems were observed over the Larsen B  
10 ice shelf in the summer of 2002 which are consistent with substantial melt initiating both mechanisms and leading to  
11 ice shelf disintegration (Glasser et al., 2008; MacAyeal and Sergienko, 2013). Alternatively, meltwater can affect ice  
12 shelf dynamics by percolating into firn and increasing its density until no pore space remains. In the absence of pore  
13 space, meltwater moves through the underlying ice sheet or collects on the surface in melt ponds. This process,  
14 operating over decades, can pre-condition the ice shelf for both hydrofracture and post-drainage flexure stress during  
15 high-melt seasons (Kuipers Munneke et al., 2014). Meltwater can also form below the surface in blue ice areas, due  
16 to the smaller extinction coefficients and lowered albedo of ice (Brandt and Warren, 1993), as well as under low-  
17 density snow on clear days, when temperatures are slightly below freezing (Koh and Jordan, 1995). Modeling studies  
18 suggest that the different sensitivities of subsurface blue-ice vs subsurface snow melt is a product of the radiative and  
19 heat transfer interactions resulting from their differing albedo, grain size and density (Liston et al., 1999a; Liston et  
20 al. 1999b). Meltwater forming over blue ice and flowing downstream to collect in subsurface layers (the ice-albedo  
21 feedback) has recently been shown to be substantial in parts of East Antarctica (Lenaerts et al., 2016). Recent work  
22 has also shown the lateral flow of meltwater (supraglacial runoff) on the Larsen A Ice Shelf in 1979 (Kingslake et al.,  
23 2017), which imply prolonged periods of lowered albedo. These surface rivers could become much more prevalent  
24 across Antarctica in future warming scenarios than previously expected, and may provide a means of stabilizing ice  
25 shelves by routing meltwater away (Bell et al., 2017).

26 Since the collapse of Larsen A and Larsen B ice shelves, ice velocities of several of their feeding glaciers  
27 have increased, and seasonal variations in flow have suggested that both summer meltwater percolation (Zwally, 2002)  
28 and the removal of backstress played a role in the acceleration (Scambos, 2004; Rott et al., 2002). The remaining  
29 Larsen C ice shelf to the south could prove to be similarly vulnerable to collapse due to atmospheric warming (Morris  
30 and Vaughan, 2013). Radar analysis over a 15-year period has shown that the surface of Larsen C has been lowering  
31 from both firn air depletion (due to either limited accumulation or high surface melt) and basal ice loss, although the  
32 latter term is thought to be more substantial (Holland, 2015). While most regional climate models (RCMs) do not  
33 account for englacial flow or surface rivers, accurate modelling of surface meltwater production is a crucial step in  
34 assessing the potential effects on the ice sheet, especially in the case of the Larsen C ice shelf.

35 The eastern AP, where the Larsen C ice shelf is located, is on average 3-5°C cooler than the western AP at  
36 the same latitude (Morris and Vaughan, 2013). When strong westerly winds force air across the bisecting mountain  
37 range of the AP (Fig. 1), the resulting föhn winds can produce pulses of warming on the eastern AP ice shelves

1 (Marshall, 2007). Föhn is a warm, dry air flow on the lee slopes of a mountain range (Beran 1967) that can contribute  
2 to melt and sublimation. Multiple studies have focused on the use of high-resolution non-hydrostatic models over the  
3 eastern AP to determine the frequency of föhn occurrence over relatively short periods (Elvidge et al., 2015; Grosvenor  
4 et al., 2014; Elvidge et al., 2016; King et al., 2017). King et al. (2017) found that over a single season, föhn flow  
5 occurred 20% of the time. This study showed substantial melt occurrence observed by satellites without föhn flow,  
6 suggesting that surface melt was influenced by other factors as well. A recent study by Turton et al., (2017), using a  
7 non-hydrostatic model, compared modelled flow characteristics during two föhn events and found that a 1.5 km  
8 version of the model was able to capture the eastward propagation of melt-inducing winds, whereas a 5km version  
9 could not, according to a comparison with AWS stations. However, Bozkurt et al. (2018) demonstrate that a 2km  
10 version of the same model was still unable to resolve high temperatures associated with the initiation of föhn flow  
11 during a short period. We note that because these modelling studies use a non-hydrostatic model, they are limited to  
12 short periods due to the prohibitive computational cost.

13 Models are limited by the parameterization of physics and our incomplete understanding of the physical  
14 processes driving the observed changes. Regional climate models (RCMs) such as the Modèle Atmosphérique  
15 Régionale (MAR), evaluated here, can be used for simulating the coupled atmosphere/surface system at a continental  
16 and decadal scale (Gallée and Schayes, 1994). The trade-off, in this case, is that RCMs might not be able to capture  
17 physical processes with the required accuracy and must be thoroughly evaluated with *in-situ* and remotely sensed  
18 observations. Several studies have used passive microwave estimates for melt occurrence alongside *in-situ*  
19 temperature data (Liu et al., 2003; Ridley, 1993; Tedesco et al., 2007; Tedesco et al 2009; Tedesco and Monaghan,  
20 2009), reporting an increase of surface melting over the AP over the 1980-1999 period (Torinesi et al., 2003).  
21 However, other studies have suggested that the findings may have been impacted by a change in the acquisition hours  
22 of the satellite and that changes in melt over the 1979-2010 period were insignificant (Kuipers Munneke et al., 2012).  
23 Melt occurrence over the AP has also been investigated using the QuikSCAT satellite product at a ~2.225km resolution  
24 (Long and Hicks, 2010) in combination with model outputs from the RCM RACMO2 (Regional Atmospheric Climate  
25 Model) and *in-situ* temperature estimates (Barrand et al., 2013). Raw backscatter values from QuikSCAT have also  
26 been used to estimates melt flux over the AP (Trusel et al., 2013; Trusel et al., 2012). A recent study using 5.5km  
27 horizontal resolution run of RACMO 2.3 over the AP suggested that a further increase in resolution would be required  
28 to properly resolve föhn wind propagation, which would imply the removal of the hydrostatic assumption (Van  
29 Wesse et al., 2015a; Van Wesse et al., 2015b). However, Wiesenekker et al. (2018) show that föhn events observed  
30 by an AWS close to the AP mountain range were well captured by a later version of the same RCM, enabling a  
31 reconstruction back to 1979. Where the hydrostatic assumption is preserved (such as with MAR), higher resolutions  
32 may inhibit flow in the model, resulting in limited eastward föhn flow in the eastern AP (Hubert Gallée, personal  
33 communication). Despite these drawbacks, the current class of hydrostatic RCMs which include relatively complete  
34 representations of the snow physics are useful tools to simulate the effect of surface melt on the snowpack over long  
35 timescales. Additionally, these high-resolution runs can easily be compared to, and potentially nested into, continental-  
36 scale runs of the same model.

1 Here, we assess the MAR model at a 10 km horizontal spatial resolution over the AP, where outputs are  
2 available over a relatively long time period (1999-2014, i.e. 15 years), using both satellite and *in-situ* data, aggregating  
3 meltwater production to drainage systems (basins) as described by Zwally (2002). While previous studies have  
4 evaluated how surface melt is modelled using satellite data, or evaluated the representation of the near-surface  
5 atmosphere with automatic weather station (AWS) data, we use both sources in conjunction to understand MAR's  
6 ability to simulate specific physical processes, i.e. to assess melt and temperature biases by wind direction. We first  
7 report total meltwater production from MAR at the basin scale and compare mean annual meltwater production with  
8 outputs from RACMO2.3p2 (Van Wessem et al. 2018), another hydrostatic RCM run at a 5.5km resolution (Sect.  
9 3.1). We evaluate surface melt occurrence from MAR at the sub-basin scale using satellite estimates and link melt  
10 occurrence biases to temperature and wind biases at a point scale using AWS data. We compare meltwater occurrence  
11 derived from two satellite sources, passive microwave "PMW" and QuikSCAT active microwave, with MAR outputs  
12 over the AP (Section 3.2). We focus primarily on the NE basin in the East AP as it contains the former Larsen A,  
13 Larsen B and current Larsen C Ice Shelf, where we define sub-regions based on high and low melt occurrence  
14 estimated by PMW algorithms (Tedesco, 2009). We then compare climatologies of melt extent, as well as inter-annual  
15 trends, from both passive and active microwave data with those computed from MAR outputs (Section 3.3). Because  
16 melt on the Larsen C Ice Shelf can potentially be initiated by northwesterly föhn flow sourced from over the AP or  
17 southwesterly flow through gaps in the mountain range (even at sub-zero temperatures), we compare melt occurrence  
18 reported by satellite estimates vs MAR (coinciding with the 2000-2009 QuikSCAT period) partitioned by temperature  
19 differences and wind direction at the location of the Larsen Ice Shelf AWS. Two additional stations (AWS14 and  
20 AWS15 are used to examine the persistence and spatial distribution of wind biases from 2009 to 2014. (Section 4).  
21 Because all three stations are located on the eastern side of the Larsen C Ice Shelf, this comparison can assess the  
22 impact of limited eastward flow on temperature and melt occurrence. In light of the model biases found in this analysis  
23 and the potential to correct them with an enhanced resolution model in the future, the discussion (Section 5) includes  
24 a sensitivity test with MAR at multiple resolutions. This is performed to specifically assess the effects of increased  
25 resolution on eastward flow and resultant surface melt. Table 1 lists abbreviations used throughout the text along with  
26 sections in which the terms are introduced.

## 27 **2. Data and Methods**

28 This study takes a combined observational and modelling approach. The primary tool used to understand the coupled  
29 atmosphere and snowpack is the MAR RCM. We employ *in-situ* data collected from 3 AWS stations to evaluate the  
30 near-surface atmosphere biases in MAR as well as to assess inter-annual trends. While *in-situ* observations of 2m air  
31 temperature are frequently treated as a proxy for melt (Braithwaite 1981), this method is most effective when the  
32 energy budget is dominated by the turbulent sensible heat flux and incoming longwave radiation and does not capture  
33 melt which can occur due to shortwave radiative forcing when air temperatures are below 0°C (Hock, 2005; Kuipers  
34 Munneke et al., 2012). We also use observations from the QuikSCAT (QS) and SMMR (Scanning Microwave  
35 Multichannel Radiometer, 1978-1987) / SSM/I (Special Sensor Microwave/Imager, 1987 - to date) satellites to  
36 evaluate both melt occurrence and intensity in MAR.

## 1 2.1 Regional climate model outputs

2 The MAR RCM is a modular atmospheric model coupled to the Soil Ice Snow Vegetation Atmosphere Transfer  
3 scheme (SISVAT) surface model (De Ridder and Gallée, 1998), which includes the multi-layer snow model Crocus  
4 (Brun et al., 1999). MAR was originally implemented to simulate energy and mass balance processes over Terra Nova  
5 Bay, Antarctica (Gallée and Schayes, 1994). Within SISVAT, meltwater is calculated at the surface when the surface  
6 reaches the melting point in combination with a surplus of energy (a deficit results in refreezing). The presence of  
7 meltwater alters the snow characteristics (for example, the type and size of snowgrains) and percolation through the  
8 snowpack is determined through a tipping bucket method based on snow density. A diagram and description of the  
9 sequence of these specific processes in MAR is provided in Figure S1.

10 The model configuration primarily used in this study is MAR version 3.5.2, with 23 sigma layers from 200  
11 hPa to the surface. This version has been used in multiple studies over Greenland; the specific updates to the physics  
12 from the original version of MAR as well as multiple uses of this model are described in detail in Fettweis et al. (2016).  
13 The fresh snow density scheme used here is a new MAR implementation specific to Antarctica which has been tested  
14 with *in-situ* observations (Agosta et al., 2018, in review) and discussed further in that study. Here, fresh snow density  
15 ( $\rho$ ) is computed as a function of 10m wind speed (WS,  $\text{m s}^{-1}$ ) and surface temperature ( $T_s$ , K) such that:

$$16 \rho = 149.2 + 6.84 \text{ WS} + 0.48 T_s \quad (1)$$

17 with a lower boundary of  $200 \text{ kg m}^{-3}$  and an upper boundary of  $400 \text{ kg m}^{-3}$ . This parameterization was tuned such that  
18 the density of the first 50cm of snow fits observations collected over the Antarctic ice sheet, although we note that no  
19 reliable measurements were available over the AP. The subsequent compaction of snow layers uses the formulation  
20 from Brun (1989). There are 30 snow/ice layers of variable thickness from the surface to a 20 m depth (below which  
21 ice is assumed present). Topography is interpolated from 1 km Bedmap2 (Fretwell et al., 2013 ; Green et al., 2016) to  
22 the MAR grid. The snowpack is initialized at  $300 \text{ kg/m}^3$  at the surface and  $600 \text{ kg/m}^3$  at depth. Following 2 years of  
23 spinup, MAR results are independent of the initial conditions ; for these results, 5 years of spinup were run.

24 MAR outputs are generated at a horizontal spatial resolution of 10 km for the years between 1999 and 2014.  
25 The model domain includes the AP region between  $-79.5^\circ$  and  $-56.9^\circ$  latitude and  $-94.9^\circ$  and  $-39.7^\circ$  longitude. Lateral  
26 boundary conditions are specified from the European Centre for Medium-Range Weather Forecasts (ECMWF), using  
27 the ERA-Interim reanalysis (Dee et al., 2011), which is also used for a direct comparison with AWS wind  
28 speed/direction. This is a single model domain with no nesting. We note that the ice (vs sea) mask used does not  
29 include the Larsen A or Larsen B Ice Shelf in order to preserve consistency for comparison between years (most of  
30 which post-date the collapse of these ice shelves). For the analysis of the effects of resolution on surface melt estimates  
31 presented in Section 5, we use three version of MAR v. 3.9. Relative to version 3.5.2, which is primarily used in this  
32 study as well as in Fettweis et al. (2017), the computational efficiency of MAR v3.9 has been improved such that  
33 increased resolution runs are potentially viable. The improvements in the physics include an increase in the lifetime  
34 of clouds, partly correcting for the underestimation of downward longwave radiation and the overestimation of inland  
35 precipitation found in Fettweis et al. (2017). MAR v3.9 setups include a version at a 10km horizontal resolution similar  
36 to the model used for the main analysis, one where the horizontal resolution is reduced to 5km and one where the  
37 vertical discretization is increased to 32 sigma layers (at a 10km resolution).

1 We consider two conditions for identifying melting based on previous work comparing MAR outputs  
2 (version 3.2) and satellite microwave melt estimates that found that passive microwave estimates were sensitive to a  
3 meltwater content of 0.4% (or mm w.e.) in the first meter of the snowpack (Tedesco et al., 2007). The first condition  
4 ( $LWC_{0.4}$ ) determines melt occurrence in MAR when the daily-averaged integrated liquid water content (LWC) in the  
5 first meter of the snowpack exceeds 0.4% for at least three consecutive days. The second condition ( $MF_{0.4}$ ) determines  
6 melting when total meltwater production over the day exceeds 0.4 mm w.e., and is intended to capture both sporadic  
7 melt (which may refreeze) and melt which has percolated into the snowpack column below 1m, i.e. equivalent satellite-  
8 based estimates could have potentially shown melt occurrence during some portion of the day. A sensitivity test was  
9 conducted with multiple thresholds, finding that the differences between a threshold of 0.1 and 1 mm w.e. (suggested  
10 by Franco et al., 2013 as a melt threshold for Greenland) was negligible overall, but more substantial on the northern  
11 Larsen C Ice Shelf, where the 4 mm w.e. threshold proved insufficient to capture melt occurrence (Fig. S2). Similarly,  
12 we performed a comparison of melt occurrence computed from 2000-2009 at the Larsen Ice Shelf AWS for all  
13 satellite-based algorithms as well as AWS-based melt-occurrence criteria, i.e. where  $MaxT2m > 0^{\circ}C$  and  $AvgT2m >$   
14  $0^{\circ}C$  (Fig. S2h). We found that neither total MAR melt occurrence nor the relative agreement with observed sources  
15 varied substantially between thresholds until a threshold of 4 mm w.e. Consequently, we use a meltwater production  
16 threshold of 0.4 mm w.e. to define melt occurrence for the remainder of the study due to its sensitivity at the northern  
17 Larsen C ice shelf. The differences in sensitivity for each satellite-based criteria for melt occurrences, as well as  
18 associated temperature biases, are discussed in detail in Section 3.1.

19 MAR meltwater production is compared to melt outputs from the RCM RACMO2.3p2, a hydrostatic model  
20 which has been run extensively over polar regions and over the AP at a 5.5km resolution at 40 vertical levels.  
21 RACMO2.3p2 is forced at the boundaries by ERA-Interim every six hours, as with MAR in this study. (Van Wessem  
22 et al., 2018). Model results over the AP for RACMO 2.3p2 did not vary substantially from RACMO2.3, which was  
23 evaluated extensively in previous work (Van Wessem et al., 2015a; Van Wessem et al., 2015b).

## 24 **2.2 Microwave satellite estimates of melt extent, duration**

25 Spaceborne microwave sensors can detect the presence of liquid water in snow over those regions where poor or no  
26 observations and unlike sensors in the visible range, microwave sensors are only weakly affected by the presence of  
27 clouds. In the case of active measurements (e.g., radar, scatterometer), the presence of wet snow is associated with a  
28 sharp decline in backscatter ( $\sigma^0$ ) (Ashcraft and Long, 2000), whereas in the case of passive microwave data the  
29 detection is associated with an increase in brightness temperature ( $T_b$ ) (Mote et al., 1993; Tedesco et al., 2007). In  
30 either passive or active microwave estimates, even the presence of a relatively small amount of liquid water (i.e. a few  
31 percent) triggers a substantial increase in the imaginary part of the dielectric constant (Ashcraft and Long, 2006; Ulaby  
32 and Stiles, 1980).

### 33 **2.2.1 Active Microwave Data: QuikSCAT**

34 We employ a wet snow high-resolution product ( $\sim 2.225km$ ) described in Steiner and Tedesco (2014) to derive melt  
35 occurrence from active microwave data. Both melt occurrence and raw backscatter values used in this analysis use

1 normalized backscattering values as measured by the Seawinds sensor onboard the QuikSCAT satellite at Ku band  
2 (13.4 GHz), with the enhanced resolution provided by the application of the Scatterometer Image Reconstruction  
3 (SIR) algorithm (Long and Hicks, 2010). Both Ku- and C-band scatterometers have been used extensively to detect  
4 melt onset and freeze-up in Antarctica and Greenland (Drinkwater and Liu, 2000; Steiner and Tedesco, 2014; Ashcraft  
5 and Long, 2006; Kunz and Long, 2006).

6 Threshold-based approaches with active microwave data, as used in this study, identify the point of melt  
7 onset based on the departure in  $\sigma^0$  from values in dry-snow with various thresholds (Ashcraft and Long, 2000; Ashcraft  
8 and Long, 2006; Trusel et al., 2012). The approach used here derives melt occurrence from a threshold-based method  
9 (ft3), which identifies melt when backscatter falls 3 dB below the preceding winter mean (Steiner and Tedesco, 2014;  
10 Ashcraft and Long, 2006). This method, along with a wavelet approach have been evaluated over the AP with AWS  
11 data at 5 locations; melt was assumed to occur at the AWS location when 2m air temperature exceeded 0°C for more  
12 than 6 hours (Steiner and Tedesco, 2014).

13 In addition to the binary detection of melt, several methods have been proposed which relate seasonally-  
14 integrated backscatter reduction to measures for melt intensity (Wismann, 2000; Smith, 2003; Trusel et al., 2013). As  
15 these methods provide seasonally-cummulative values, we do not employ them in this study, although we do examine  
16 raw backscatter values as a proxy for melt flux.

### 17 2.2.2 Passive Microwave Data

18 We complement the assessment of MAR with estimates of melt extent and duration obtained from passive microwave  
19 observations which have been used in the past to assess melt occurrence in Antarctica and Greenland using brightness  
20 temperature at 19.35 GHz with a horizontal polarization (Tedesco, 2007). One of the major disadvantages of passive  
21 microwave is the relatively coarse horizontal spatial resolution (25 km) with respect to the fine-scale topography  
22 characterizing the AP. However, the historical record for passive microwave data extends as far back as 1972.  
23 Threshold-based methods for melt detection from passive microwave data range from a combination of multiple  
24 frequencies and polarizations (Abdalati and Steffen, 1995) to using a single frequency, single polarization (e.g., Mote  
25 et al. 1993, Tedesco 2009), as is used in this study. Three algorithms are used here which are described in detail in  
26 (Tedesco, 2009). These include the 240-algorithm where the threshold was determined as the value above which an  
27 increase in liquid water content above 1% no longer produces an increase in  $T_b$ , based on output of an electromagnetic  
28 model. The original threshold of 245K was found to be insufficiently sensitive and reduced to 240K for this study  
29 (Tedesco, 2007) (M. Tedesco, personal communication). The second algorithm uses the winter mean threshold-based  
30 method ALA:

$$31 \quad T_c = T_{winter} * \alpha + T_{wet_{snow}} * (1 - \alpha) \quad (2)$$

32 where snowmelt is assumed to occur when the brightness temperature ( $T_b$ ) exceeds a threshold brightness temperature  
33 ( $T_c$ ) based on the mean winter (JJA)  $T_b$ , the wet snow  $T_b$  ( $T_{wet_{snow}}$ , equal to 273K) and a mixing coefficient ( $\alpha$ , equal  
34 to 0.47). For the ALA algorithm, Ashcraft and Long (2006) presume a wet layer of 4.7 cm and a Liquid Water Content  
35 of 1%. Finally, the third algorithm (zwa), determines melt occurrence when  $T_b$  exceeds a threshold value  $T_c$  which is

1 based on the on the winter mean threshold ( $T_{winter}$ ) and a threshold value ( $\Delta T$ ), in this case 30K (Zwally and Fiegles,  
2 1994)  
3  $T_c = T_{winter} + \Delta T$  (3)

### 4 **2.3 AWS measurements**

5 We evaluate the MAR simulation of the near-surface atmosphere using pressure, temperature and wind speed data  
6 collected by three automatic weather stations (AWS) on the AP (Fig 1). The comparison between MAR outputs and  
7 AWS data for surface pressure are provided in supplementary data. Data from the Larsen Ice Shelf AWS is obtained  
8 from the University of Wisconsin Madison (AMRC, SSEC, UW-Madison) at a 3-hourly temporal resolution. AWS  
9 data from two additional sites on the Larsen Ice Shelf (AWS14 and AWS15) are obtained from the Institute for Marine  
10 and Atmospheric Research at Utrecht University (IMAU) at an hourly resolution (Kuipers Munneke et al., 2012). We  
11 note that the Larsen Ice Shelf AWS (-67.00 °S, -61.60°W) and AWS14 (-67.00°S, -61.5°W) fall within the same MAR  
12 grid cell.

13 AWS values are temporally averaged to obtain mean daily values for the comparison with MAR outputs.  
14 Metrics are computed for December-January-February (DJF, summer). We did not compute a seasonal average when  
15 more than 5 consecutive days of data were missing. The five-day period was chosen as an upper limit for the length  
16 of a synoptic event, corresponding spatially to approximately 145 MAR grid cells (or half the model domain) of  
17 continuous flow in a single direction for an average windspeed of 3.4 m/s, which is the expected value (i.e. the  
18 predicted mean based on the Weibull distribution), for Larsen Ice Shelf AWS in DJF from 1999-2014 (Fig. 7c). Near-  
19 surface (2m) air temperature values are corrected for a difference between AWS station elevation and the elevation  
20 averaged by the corresponding MAR gridcell by calculating the elevation gradient from surrounding MAR gridcells  
21 and interpolating the final value for the AWS location's recorded elevation using the Bedmap2 DEM (Fretwell et al.,  
22 2013). Differences in elevation values between MAR at 10km resolution and those recorded at AWS stations were as  
23 large as 23 m. Maximum daily 2m air temperature (MaxT2m) is calculated as well because this measure may help  
24 capture sporadic melt events. MaxT2m values are extracted from available 3-hourly values and are used only when  
25 no more than one 3-hour measurement is missing during the day. Pressure values from AWS stations are also observed  
26 at approximately 2m above the surface, and compared to MAR values at the first atmospheric layer in MAR. Because  
27 the height of this layer is generally between 2 and 3 m above the surface, this is treated as an acceptable proxy for 2m  
28 pressure values. Pressure values from MAR are corrected for elevation using the hypsometric equation (Wallace and  
29 Hobbs, 1977).

### 30 **2.4 Statistical Methods**

31 To evaluate and quantify the differences between MAR outputs and AWS data for temperature and wind speed we  
32 use a mean bias. Additional statistical measures shown in supplemental data include the coefficient of determination  
33 ( $R^2$ ), root mean squared error (RMSE) and mean error (ME) (Wilks, 1995). We assess the extent to which each station  
34 is representative of larger scale climate variability by constructing correlation ( $R^2$ ) maps between MAR values co-



1 located with AWS stations vs all other gridpoints in the full MAR domain (Fig. S7). We ignore all  $R^2$  statistics where  
2 the p-value exceeds 0.05.

3 To capture wind speed frequency distributions, we fit available data for each season for MAR (for the full  
4 2000-2009 period), AWS (when AWS data are available) and MAR-R (MAR values collected only when AWS data  
5 is available) with a Weibull distribution (Wilks, 1995). The shape ( $\beta$ ) parameter roughly captures the degree of skew,  
6 with higher values being closer to a normal distribution. The scale ( $\lambda$ ) parameter approximates the peak frequency  
7 (we note that this is not equivalent to the arithmetic mean). We report expected values (i.e. first moment or mean) for  
8 each windspeed distribution using the best Weibull fit.

### 9 **3. Results: Melt Occurrence and Meltwater Production**

10 In this section, we show results concerning total meltwater production in the AP and compare melt occurrence  
11 estimated by MAR with estimates from three passive microwave algorithms as well as QuikSCAT ft3. The relative  
12 sensitivity of each melt occurrence criteria, as well as their associated temperature biases, are first compared at the  
13 location of the Larsen Ice Shelf AWS. We then identify spatial biases for melt occurrence at the domain scale, finding  
14 substantial differences in the center of the Larsen C Ice Shelf as well as to the north and west of the NE basin, a region  
15 which includes the former Larsen A and B ice shelves as well as the northernmost portions of the Larsen C ice shelf  
16 (Section. 3.2). These differences could result from either weaknesses in the MAR representation of wind dynamics  
17 (discussed in Section 4) or from limitations of the satellite sensor or algorithm. Finally, we compare the climatology  
18 and inter-annual variability of melt extent (calculated by multiple algorithms) over the CL and NL region (Section.  
19 3.3).

#### 20 **3.1 Meltwater production over the AP**

21 We show MAR meltwater production over the 1999-2009 period (Fig. 2). The total annual meltwater production  
22 estimated by MAR shows substantial inter-annual variation with the NE basin accounting for the highest meltwater  
23 production, closely followed by the SW basin (in green). The NE basin is divided into three regions: the NL and CL  
24 masks (discussed in Section 3.2) and the remainder of the basin. We note that the SW basin does not covary with the  
25 NE basin and the subregions of the NE basin do not consistently covary with one another. The meltwater production  
26 shown here does not account for refreezing and we note that the effects of refrozen melt on the snowpack will vary  
27 regionally depending on local properties. The NL region dominates meltwater production in the NE basin in most  
28 years except for 1999-2000, 2002-2003 and 2003-2004. The 2001-2002 melt season shows the second lowest overall  
29 melt production during the study period (only the preceding year is lower). Declining aggregate meltwater production  
30 across the AP does not necessarily correspond to declining meltwater production in the most vulnerable regions of the  
31 northeastern AP (including the Larsen C Ice Shelf). Because melt in the NL region is particularly sensitive to föhn-  
32 induced melt, we note that changes in circulation patterns may affect the northwest regions differently than the  
33 southern regions. The strong relationship between wind direction and temperature bias points to the need for isolating

1 dominant inter-annual patterns of melt in the Northern Larsen C Ice Shelf and associating them with large-scale  
2 atmospheric drivers.

3 A comparison between mean annual meltwater production from 2000-2009 calculated using RACMO2.3p2  
4 (5.5 km) vs MAR (10km) is shown in Fig. 3. MAR shows higher meltwater production overall (Fig. 3b vs 3a), with a  
5 difference of over 150 mm w.e. on the Larsen C ice shelf north of 67°S latitude. Over the NE basin, MAR meltwater  
6 shows enhanced meltwater production near the AP mountains, including towards the southern edges, and declines  
7 eastward and southward. By comparison, meltwater production from RACMO2.3p2 melt declines southward, but no  
8 similar west-to-east gradient is apparent. Although inter-annual standard deviations over the northern Larsen C ice  
9 shelf are generally above 100 mm w.e. in both models, there are major differences in other regions, with MAR  
10 meltwater production exceeding RACMO2.3p2 values by 30 mm w.e. on the southern Larsen C ice shelf as well as  
11 the George VI ice shelf (Fig. 3d vs 3c). Van Wessem et al. (2015a) suggest that even at 5.5 km resolution, the  
12 underestimation of the height and slope of the orographic barrier may result in an underestimation of föhn winds as  
13 well as precipitation in RACMO2.3p2. We note that in addition to the difference in horizontal model resolution,  
14 RACMO2.3p2 contains 40 atmospheric layers while MAR implements 23 layers. While the differences in total  
15 meltwater production from RACMO2.3p2 and MAR could be a product of dissimilar physics, the potential effect of  
16 model resolution on meltwater production in MAR is specifically discussed in Section 5. While melt occurrence and  
17 meltwater production are not related in any linear fashion, we note that the spatial pattern produced by MAR, i.e. the  
18 eastward gradient from the edge of the AP, is also shown in observed melt occurrence estimates, most notably from  
19 the PMW zwa and QS algorithms (Fig. 5f,g), as discussed in greater detail in the next section.

### 20 **3.2 Melt occurrence over the AP**

21 Fig. 4 shows melt occurrence (in days) at the Larsen Ice Shelf AWS location (shown in Fig. 1) as estimated from the  
22 satellite-based algorithms QuikSCAT ft3 (Section 2.2.1), three passive microwave algorithms (Section 2.2.2),  
23 temperature-based criteria from the AWS station ( $\text{MaxT2m} > 0^\circ\text{C}$  and  $\text{AvgT2m} > 0^\circ\text{C}$ ), and the  $MF_{0.4}$  metric derived  
24 from MAR (Section 2.1). At this location, we find that QuikSCAT ft3 and PMW ZWA show the greatest sensitivity  
25 to melt occurrence. Of the AWS-based metrics, M ( $\text{MaxT2m} > 0^\circ\text{C}$ ) shows a sensitivity to melt occurrence comparable  
26 to PMW ALA while the T metric ( $\text{AvgT2m} > 0^\circ\text{C}$ ) compares poorly to satellite-based measures (Fig. 4a). We find  
27 that at colder temperatures (when  $\text{MAXT2m} < 0^\circ\text{C}$ ),  $\text{AvgT2m}$  values reported by MAR are substantially higher than  
28 those reported by the AWS when only MAR reports melt (Fig. 4b). However, at higher temperatures (where  $\text{MaxT2m}$   
29  $\geq 0^\circ\text{C}$ ), the AWS reports higher  $\text{MaxT2m}$  temperatures than MAR and biases are even stronger when only  
30 observation-based metrics report melt (Fig. 4e). We note that the Larsen Ice Shelf AWS is located on the eastern edge  
31 of the Larsen C ice shelf and the major discrepancies in melt occurrence at this location will be explored further in  
32 Section 4, where we further expand the analysis of melt occurrence and temperature biases to include wind direction  
33 biases as well.

34 In Fig. 5, we show melt occurrence over the full domain derived from satellite sources, both metrics derived  
35 from MAR (Section 2.1) as well as the  $MF_{0.4}$  criteria applied to RACMO2.3p2. QuikSCAT ft3 generally estimates  
36 higher average yearly melt occurrence than either of the MAR melt metrics over the full domain. In the NE basin, the

1 difference is on the order of 25 more days than the MAR  $MF_{0.4}$  melt metric (Fig. 5g). Differences between QuikSCAT  
2 ft3 and  $MF_{0.4}$  also show a strong latitudinal dependence in the NE basin, shifting from near agreement in the northern  
3 regions of the Larsen C Ice Shelf to QuikSCAT ft3 reporting over 500% of the melt days reported by MAR towards  
4 the southern edge. Melt onset is on the order of 22 days earlier in QuikSCAT ft3 than in  $MF_{0.4}$  in the NE basin, except  
5 at the northern edge of the Larsen C ice shelf, where  $MF_{0.4}$  reports average yearly melt onset as much as 25 days  
6 earlier than QuikSCAT ft3 (Fig. S3). A comparison between the two MAR melt metrics shows that  $MF_{0.4}$  reports as  
7 much as 40 more days of melt than  $LWC_{0.4}$  at the northern tip of the Larsen C Ice Shelf (Fig 5b vs Fig 5a). The portion  
8 of the Larsen C ice shelf which experiences an average of 25 days of melt or more extends as far south as 80.0°S on  
9 the eastern side of the Larsen C ice shelf according to the  $MF_{0.4}$  metric but extends only to 70.5°S according to  $LWC_{0.4}$ .  
10 Towards the very south of the Larsen C Ice Shelf, the two MAR metrics show similar values, although  $LWC_{0.4}$  reports  
11 melt onset as late as early January (Fig. S3a) while  $MF_{0.4}$  reports melt onset in December (Fig S3b). The formulation  
12 for the  $MF_{0.4}$  metric, which considers melt at any time of the day for the full depth of the snowpack, suggests that the  
13 early season melt observed only by  $MF_{0.4}$  is either sporadic (i.e. can refreeze) and/or percolates below 1m in the  
14 snowpack in the south of the Larsen C Ice Shelf, i.e. below the depth range at which  $LWC_{0.4}$  is calculated. Whereas  
15 QuikSCAT ft3 and MAR melt metrics report maximum melt occurrence in the north and west of the Larsen C Ice  
16 Shelf ( $MF_{0.4}$  reporting > 60 days, Fig. 5b), PMW algorithms report maximum melt occurrence in the center-east of  
17 the Larsen C Ice Shelf, specifically 43 days (240, Fig. 5c), 57 days (ALA, Fig. 5d) and 69 days (ZWA, Fig. 5e).  
18 RACMO2.3p2 reports substantially higher melt occurrence than MAR at the center of the Larsen C ice shelf as well  
19 as a comparatively limited west to east gradient. Because overall average annual meltwater production in MAR was  
20 shown to be substantially higher, with a stronger west-to-east gradient away from the AP (Fig. 3), we conclude that  
21 in comparison to RACMO2.3p2, MAR produces melt less frequently, but with greater intensity.

22 In summary, a comparison between observed and modeled data sources show two distinct spatial patterns for  
23 maximum melt occurrence. QuikSCAT ft3 as well as both MAR melt metrics show the highest range of melt days in  
24 the northern and western edges of the Larsen C Ice Shelf (including both high and low elevation regions) while PMW  
25 algorithms show the highest number of melt days in the center of the Larsen C Ice Shelf, where elevations are lower  
26 and topography is less complex. We hypothesize that the major difference in spatial patterns between algorithms/melt  
27 metrics is related to the different resolutions of the data sources (~2.2225 km for QuikSCAT, 10km for MAR and  
28 25km for PMW), such that QuikSCAT is better able to resolve melt where topography is complex, such as near the  
29 spine of the AP. Secondly, the differences are a product of the depths presumed for the calculation of meltwater  
30 content. This is true for both the MAR metrics and for the three PMW algorithms; the “ALA” algorithm, for example,  
31 presumes a 4.7cm depth and a 1% liquid water content. (see Section 2). To confirm this, we find the maximum depth  
32 to which meltwater percolates (according to MAR) associated with the number of days when melt occurs (according  
33 to PMW algorithms). Histograms for total PMW melt days in Fig. S4 show three peaks (two major inflection points)  
34 for each algorithm which are used to create three classes for meltwater occurrence (“low”, “medium” and “high”). For  
35 these classes, the maximum depth to which meltwater percolates (in MAR) is shown in Fig. S6 and the associated  
36 elevation and MAR meltwater production is shown in Table S1.

1 Spatial regions defined as having “low” melt occurrence are highly heterogeneous with regard to elevation,  
2 meltwater percolation and the relative sensitivity of PMW algorithms. Low melt occurrence regions largely include  
3 the spine of the AP and regions just east of it. Bedmap2 (Fretwell et al., 2013) reports a large range of elevations while  
4 MAR reports low coincident meltwater production and a relatively shallow meltwater depth. Both the ALA and ZWA  
5 algorithms report melt at higher elevations (above approximately 1300m and 1900m, respectively) than the 240  
6 algorithm, which neither reports any melt occurrence above 1100m in the NE basin nor at lower elevations to the north  
7 and south. (Table S1, rows 1,4,7 and Fig. S6). Where melt occurrence is low, the 240 and ALA algorithms generally  
8 detect melt only where MAR reports a maximum meltwater percolation depth below 0.4 m, (Fig S6a,b), whereas the  
9 ZWA algorithm can detect melt at a substantially shallower depth of 0.1 m (Fig S6c). Although generally meltwater  
10 in MAR rarely percolates below 3m, in low melt-occurrence regions, modeled meltwater occasionally percolates  
11 below 10m in the beginning of the melt season (Fig. S6 a,b,c, column “N”, indicating November). We remind the  
12 reader that melt occurrence within the firm layer (as calculated by MAR  $MF_{0.4}$ ) will capture melt that can refreeze  
13 immediately, so this does not necessarily correspond to melt which is retained in the snowpack. Rather, the snowpack  
14 layer depth represents the deepest layer which is affected by the melt process according to MAR.

15 By contrast, where PMW reports high melt occurrence in the NE basin, MAR consistently reports high  
16 coincident meltwater production, low elevations and the deepest average meltwater percolation in the region. In the  
17 month of January, we find that where PMW algorithms report melt, coincident MAR meltwater percolates to 2 m into  
18 the snowpack for 35-47% of the total day-pixels in the NE basin which report any melt, and as deep as 3 meters for  
19 more than 30% of total day-pixels (Table S1, 240-H, ALA-H, ZWA-H, Fig. S6 g,h,i).

20 To quantify the two major spatial trends for maximum melt occurrence, i.e. (1) PMW in the center-east of  
21 the Larsen C ice shelf and (2) QuikSCAT ft3 and MAR in the northwest of the NE basin, we (a) explicitly calculate  
22 concurrent melt occurrence in all PMW algorithms (PMWAll) for the first region and (b) define the latter  
23 geographically in order to include most of the NE basin, but deliberately exclude center-east of the Larsen C ice shelf  
24 region where PMW melt is highest. The first region “CL” (Center Larsen, as the entire region is restricted to the Larsen  
25 C ice shelf), where all PMW algorithms agree on high melt occurrence, is defined where PMWAll reports average  
26 yearly total melt days exceeding one standard deviation from the mean for the NE basin. Mean elevation for the CL  
27 region is  $42.70 \pm 17.70\sigma$  m (where  $\sigma$  is one standard deviation). PMWAll reports a mean annual 36 days of melt  
28 occurrence (vs 21 days derived from  $MF_{0.4}$ ) and the mean annual MAR meltwater production calculated only where  
29 PMWAll reports melt occurrence is 96 mm w.e./100km<sup>2</sup> (vs 143 mm w.e./100km<sup>2</sup> when  $MF_{0.4}$  reports melt)(Table  
30 S1, row 11,12).

31 The “NL” (Northern Larsen) mask is defined by finding the mean latitude of the CL region and including all  
32 portions of the NE basin above this latitude, but excluding the CL region (Fig. 2, inset). In the NL region, elevation is  
33 highly-variable, with a mean value ~600m and MAR and QS detect melt both earlier and more often than for PMW  
34 algorithms. The NL region includes the eastern spine of the AP and most inlets (including Cabinet Inlet and SCAR  
35 Inlet), a small portion of the northern Larsen C ice shelf and all regions surrounding the former Larsen A and Larsen  
36 B ice shelves.

### 3.3 Climatology and inter-annual trends for melt extent at the sub-basin scale

We compare the seasonal cycle and interannual variability of melt as modeled by MAR vs observations for both the CL and NL regions by computing regional melt extent over the 2000-2009 period (total melt extent area for each day in NDJF), for each year as well as the climatological average. The PMWAll algorithm is typically treated as the most restrictive condition while the PMW zwa and QuikSCAT ft3 are the most sensitive. Melt extent is defined as the total area reporting melt daily between Nov 1<sup>st</sup> and February 28<sup>th</sup> (austral summer, including November to show early melt)(Fig. 6).

The melt extent climatology for PMWAll in the CL region shows the initial increase in sustained melt occurring around December 15<sup>th</sup> with melt extent peaking in January, followed by a series of increasingly smaller melt pulses ending with refreezing at the end of February. While MAR shows peak melt extent at the same point in the season, the progression from melt onset is more gradual, average peak melt extent is generally smaller and interannual variability (indicated by the grey envelope) during peak melt extent is larger (Fig. 6c vs Fig. 6a). In the CL region, the PMWAll metric is generally restricted by the low sensitivity of the 240 algorithm. Interannual variability for melt extent is substantial, with PMWAll reporting a larger melt extent than MAR towards the middle of the melt season in most years (Fig. 6b,d), but not necessarily during melt onset or its ending. In the CL region, PMWAll reports a larger melt extent throughout the melt season during 2000-2001 and 2001-2002 (Fig. 6d). During three periods, MAR reports a larger melt extent than PMWAll, including 1999-2000, the latter half of the 2002-2003 season and the 2003-2004 season. While the highly-sensitive PMW ZWA algorithm (Fig. 6e,f) reports sporadic periods where MAR melt extent is larger (during the 1999-2000 and 2003-2004 melt seasons, for example), ZWA generally reports either a larger melt extent or general agreement with MAR. Similarly, melt extent derived from the QuikSCAT ft3 algorithm consistently shows a larger melt extent than MAR, except for a few short periods towards the end of the season in 1999-2000 and 2003-2004 (Fig. 6 g,h). We note that for several years, both QuikSCAT ft3 and PMW ZWA report substantial melt occurrence early in the season (~Nov 15<sup>th</sup>) and that the QuikSCAT ft3 climatology frequently reports melt occurrence in the CL region well after February (Fig. 6g).

The NL region includes areas which reported low melt occurrence in all PMW algorithms, variable meltwater percolation depth in MAR was variable, and a large range of elevations was observed (Section 3.2), implying that the mask defined by the combined PMWAll algorithm is less clearly linked to consistent modeled physical properties in this region. Here, the MAR melt extent climatology (Fig. 7a,b) is consistently larger than PMWAll throughout the season (Fig. 7c,d). In comparison to the ZWA (Fig. 6c) and QuikSCAT ft3 (Fig. 7g) algorithms, MAR reports less melt extent in the middle of the season (with peak melt extent in January), but larger melt extent at the beginning and end of the melt season. As compared with the CL region, the MAR climatological melt extent shows less inter-annual variability (grey envelope, Fig. 7a). During the 2000-2001 and 2001-2002 melt seasons, MAR shows a larger melt extent than PMWAll (Fig. 7d), but less than the PMW ZWA (Fig. 7f) or QuikSCAT ft3 (Fig. 7h) algorithms. We find that during the 2005-2006 season, MAR shows greater melt extent than PMWAll, consistently less than QuikSCAT ft3, but reports a greater melt extent than ZWA only towards the end of the season. We consider the condition where only QuikSCAT ft3 or PMW ZWA show a greater melt extent than MAR to be potentially indicative of sporadic surface melt.

1 In summary, we conclude that in the CL region, MAR reports a larger melt extent from 2009-2009 than  
2 PMWAll (which is highly-restrictive), but a smaller melt extent than either the PMW ZWA or QuikSCAT ft3  
3 algorithms, which are more sensitive. Notably, MAR melt occurrence is comparatively low during the peak melt  
4 period. By contrast, in the NL region, MAR reports greater melt occurrence than the most restrictive measure  
5 (PMWAll) during peak melt, but far less than the highly-sensitive QuikSCAT ft3 algorithm. The interannual  
6 comparison suggests that MAR shows substantially less melt occurrence than observations during the 2000-2001 and  
7 2001-2002 seasons in the CL region, but not the NL region.

#### 8 **4. Results: Wind and Temperature Biases at the Larsen Ice Shelf station**

9 The eastern AP is generally substantially colder than the western AP, and temperature-driven melt primarily results  
10 from either large-scale advection from lower latitudes or from westerly föhn flow over the spine of the AP (Marshall  
11 et al., 2006). Here, we assess the bias in temperature and melt occurrence associated with wind direction at three AWS  
12 locations on the Larsen C Ice Shelf (shown in Fig. 1). We first discuss wind direction and wind speed biases during  
13 the summer season at all three locations (without regard to melt occurrence) (Section 4.1). For prominent wind  
14 direction biases, we quantify the associated temperature and melt occurrence biases in order to capture atmospheric  
15 conditions where MAR reports less melt occurrence than observations (Section 4.2). All MAR and satellite data used  
16 are co-located to the grid cell associated with the AWS (Fig. 1), and we remind the reader that all three stations, at the  
17 eastern edge of the CL region (Fig. 2 inset), are located where MAR reported substantially less melt occurrence than  
18 PMW algorithms, QuikSCAT ft3 or AWS temperature-based criteria.

#### 19 **4.1 Aggregate wind direction biases**

20 Fig. 8 shows wind frequency distributions during the summer season, color-coded for wind direction as represented  
21 by the pie graph at the right. We note that AWS data are 3-hourly averages and ERA-Interim are 6-hourly averages  
22 for wind speed and direction, while MAR produces daily-averaged outputs. For this reason, a direct comparison  
23 between Weibull parameters derived from MAR vs AWS data is not fully justified. The Larsen Ice Shelf AWS has  
24 full temporal coverage during the QuikSCAT period while AWS14 and AWS15 were installed after termination of  
25 the QuikSCAT mission. These last two stations are used in this study to demonstrate that (a) similar wind biases  
26 persisted after the QuikSCAT period at multiple locations, as AWS 14 the Larsen Ice Shelf AWSs are co-located to  
27 the same MAR grid cell and that (b) wind biases vary slightly by latitude, AWS15 being located slightly to the south.

28 Both MAR and AWSs at all stations show a larger proportion of northerly winds at lower windspeeds (Fig. 8, in  
29 yellow and blue), although AWSs report a greater frequency of southwesterly and northwesterly flow (Table 2 col.  
30 4,5 rows 4-9). At the Larsen Ice Shelf AWS location, both AWS and MAR report dominant northeasterly flow (Table  
31 2, rows 4,8, col2). However, the Larsen Ice Shelf AWS reports slightly more flow which is either southwesterly  
32 (28.9% for AWS vs. 23.2% in MAR) or northwesterly (19.3% for AWS vs. 14.1% in MAR) while MAR reports more  
33 southeasterly flow overall (23.5% in MAR vs. 17.4% in AWS). These biases are more pronounced at the southern  
34 AWS15, where modelled temperature correlates with a larger portion of the southern Larsen C Ice Shelf than for  
35 AWS14 (Fig. S7, Fig. 8i,j). ERA-Interim reports substantially more northwesterly flow than either AWS or MAR and

1 a smaller proportion of southwesterly flow in the 180°- 225° range (especially at the southernmost AWS15 location),  
2 although easterly flow is equivalent to AWS-reported estimates. We note that although ERA-Interim has been shown  
3 to reproduce the basic structure of föhn flow (Grosvenor et al., 2014), the horizontal spatial resolution may be too  
4 coarse to adequately capture southwesterly gap flow here. As discussed further in Section 5, westerly flow towards  
5 the stations used in this study may be strongly affected by the fine-scale representation of topography (which is coarse  
6 in ERA-Interim) and the lowered orographic barrier due to the smoothing of topography in the northwest in ERA-  
7 Interim may contribute to the enhanced northwesterly flow reported by ERA-Interim.

#### 8 **4.2 Wind and temperature biases concurrent with observed melt occurrence**

9 When daily-averaged temperature (AvgT2m) values are high, it is more likely that melt is sustained, while high  
10 maximum daily temperatures (MaxT2m) can also occur during sporadic melt. Melt occurrence is strongly influenced  
11 by the temperature of the snow column as well as at the surface; internal melting can occur even when the surface is  
12 frozen due to net outgoing longwave radiation (Holmgren, 1971; Hock, 2005). It is therefore possible for melt to occur  
13 despite a cold bias. In general, we find a small, but consistent warm MAR bias for AvgT2m, and a consistent cold  
14 MaxT2m bias (Table 2, rows 12,13). However, when we restrict the dataset to days when AWS-recorded temperatures  
15 exceed 0°C, a condition where melt is most likely, MAR indicates a cold bias for AvgT2m and an enhanced cold bias  
16 for MaxT2m (Table 2, rows 15,16). This implies that MAR is colder than observations at the temperature ranges  
17 where melt is likely, although melt is still possible due to other components of the energy balance.

18 The cold MaxT2m temperature bias is strongest during northerly flow in general (Table 2, row 13,16, col 2,5),  
19 but strongest during easterly flow on the days when MAR reports melt (Table 2, row 23,26, col 2,3). Satellite-based  
20 melt is detected primarily when AWS-recorded flow is northeasterly (0°-90°) or southwesterly (180°-270°), with  
21 PMW(QS) reporting 42%(36%) northeasterly flow and 29%(26%) southwesterly flow. On days when MAR reports  
22 melt (Table 2, rows 19,20), southeasterly flow in MAR is more prominent (while AWS values decline) while the  
23 proportion of northwesterly flow declines (but increases at the AWS). We find that the major flow biases account for  
24 a relatively small proportion of melt which is captured by observations but not by MAR. The easterly flow bias  
25 accounts for 8%(9%) of days where PMWAll(QS) melt occurrence is not also captured by MAR (Table S9) while the  
26 southerly flow bias accounts for 6%(6%) of days when PMW(QS) melt occurrence is not also reported by MAR (Table  
27 S8). For these wind direction biases, Fig. 9 presents temperature values when observed sources, either PMW All or  
28 QuikSCAT ft3, report melt, but MAR does not. We refer to the condition where PMWAll reports melt (but MAR does  
29 not) as “PMWEx” (i.e. PMW exclusive-or), with the equivalent condition for QuikSCAT ft3 called “QSEx”. We limit  
30 the melt days shown in each figure panel to a specific wind bias, thus showing how the wind bias directly influences  
31 temperature-driven melt in both satellite-based observations as well as MAR. Tables S8-S12 contain relative  
32 proportions of each case (flow bias) divided for each restriction (i.e. MAR, QSEx or PMWEx), as well as the timeseries  
33 mean and biases for AvgT2m, AvgT2m>0°C (excluding days when AvgT2m values from AWS are below 0°C),  
34 MaxT2m and MaxT2m >0°C.

35 For the main biases, i.e. when MAR either reports northerly winds as southerly (Fig. 9a,b) or westerly winds  
36 as easterly (Fig. 9 c,d), modelled temperature values are clustered around 0°C, whereas AWS-observed temperatures,

1 especially when only satellite-observed melt occurs, are higher. When MAR reports melt, MAR AvgT2m values  
2 cluster near 0°C, with a small overall warm bias (Tables S8,S9, row 4, col 8). Under omission conditions (PMWEx  
3 and QSEx), AvgT2m values are lower, and the MAR bias is slightly negative, although the standard deviation is high  
4 (Tables S8, S9, row 5,6, col 7). With all flow cases, only QuikSCAT ft3 shows melt at very low observed AvgT2m  
5 values. By contrast, AWS MaxT2m values are substantially higher than MAR values (the latter clustering around 0°C)  
6 (Fig. 9b,d). Temperature biases associated with southwesterly flow are similar to those shown by the overall bias  
7 towards easterly flow in MAR, and are shown in Table S10,S11.

8 Northwestery winds are most likely to produce föhn-induced melt and we find that on days when MAR  
9 reports melt, only 13.2% of winds are northwesterly while AWS reports 25.2% of flow as northwesterly (Table 2,  
10 rows 9,10, col 5). Northwestery winds show the highest expected windspeeds as well as the highest standard deviation  
11 for both MAR and AWS (Table 2, rows 19,20, col 5). While the temperature bias when wind directions are in  
12 agreement is relatively minimal, the temperature bias when northwesterly winds are misrepresented is substantial.  
13 When MAR reports melt but misrepresents northwesterly winds (this condition accounts for 3% of all MAR melt  
14 days), the cool bias for MaxT2m > 0°C is above 4°C (Table S12, row 4, col 10). For the PMWEx condition (when  
15 PMW reports melt but MAR does not), AWS MaxT2m values exceed MAR values by more than 5°C (Table S12, row  
16 5, col 10). Despite the strength of the temperature bias, this wind direction bias accounts for only 3% of melt in MAR  
17 and only 3%(4%) of melt occurrence reported by PMWEx(QSEx). By contrast, when westerly flow is modelled  
18 accurately, MAR captures higher AvgT2m values, which frequently exceed 0°C, with a slight cool MAR bias when  
19 AvgT2m > 0°C (Fig. 9e). The PMWEx and QSEx conditions still report melt at lower temperature values, and the  
20 MAR bias remains positive. Although a cold MAR bias persists, MaxT2m values are generally in better agreement at  
21 the Larsen IS AWS location during this condition (Fig 9f, Table S12).

22 **5. Discussion and Conclusions**

23 We conclude that MAR captures melt which occurs just east of the AP (which is normally the product of westerly  
24 föhn flow) with acceptable accuracy according to satellite estimates, but that that melt is underestimated with respect  
25 to both AWS and satellite estimates in the eastern part of the Larsen C Ice Shelf. This is partially the result of limited  
26 westerly flow in MAR towards the eastern part of the Larsen C ice shelf, as compared to AWS estimates. Specifically,  
27 MAR shows lower melt occurrence than satellite estimates in the center and east of the Larsen C Ice Shelf (i.e. the  
28 CL region, where eastward flow is likely limited in MAR), while in the north and west of the NE basin (i.e. the NL  
29 region which is most immediately affected by westerly flow), MAR reports melt occurrence largely concurrent with  
30 satellite estimates. The NL region fits a spatial pattern of föhn-induced melt just lee of the AP and extending eastward  
31 from inlets which has been shown in previous studies (Grosvenor et al., 2014) and particularly in the northernmost  
32 portion of the NE basin surrounding the Larsen B ice shelf, where the correlation between föhn winds and satellite-  
33 based melt occurrence has been shown to be as high as 0.5 between 1999-2002 (Cape et al., 2015, Fig. 12). For  
34 example, within the CL region, there are periods during the 2001-2002 season when MAR reports no meltwater  
35 production, but raw QuikSCAT backscatter values report periods where over 300 km<sup>2</sup> of surface area show backscatter  
36 values dipping below -15 dB (Fig. S9e).



1 MAR reports warmer temperature compared to AWS observations recorded on the east of the Larsen C ice shelf  
2 at temperatures below 0°C, when melt is less likely to occur, but which may still impact the refreezing process.  
3 However, when maximum daily temperatures (MaxT2m) and average daily temperatures (AvgT2m) exceed 0°C,  
4 MAR shows a substantial cold bias. This is particularly evident when MAR misrepresents westerly winds or northerly  
5 winds, and the temperature bias is most extreme when northwesterly flow is misrepresented, i.e. the condition when  
6 the most intense föhn flow would be likely. However, this represents only a small proportion of the melt occurrence  
7 bias, i.e. melt occurrence reported by satellite estimates, but not by MAR.

8 We demonstrate the impact of westerly winds on melt during a single season, specifically during both mid-  
9 December and the beginning of January of the 2001-2002 season. During both of these periods, satellite-based melt  
10 extent in the CL region increases substantially, while MAR melt extent declines after an initial pulse (Fig. S9a). In  
11 December, MAR shows an increase in northwesterly flow, both at the station and throughout the region while AWS  
12 reports northwesterly winds at slightly higher speeds. Beginning approximately on January 1<sup>st</sup>, the NL region reports  
13 substantial northwesterly flow, followed by southwesterly flow, although neither is reported at the Larsen Ice Shelf  
14 AWS station east of the NL region. Over January, while both AWS and MAR report northeasterly flow, the AWS  
15 station also reports substantial high-speed southwesterly flow not captured by MAR. After this period (beginning on  
16 approximately Jan. 1<sup>st</sup>), AWS AvgT2m temperatures consistently exceed MAR AvgT2m values until the end of the  
17 season (Fig. S11), suggesting that because MAR did not accurately model the initial intrusion of westerly winds,  
18 subsequent temperature-induced melt was limited over the eastern Larsen C ice shelf, where this AWS is located.  
19 Presuming that the flow characteristics are largely similar in this relatively flat region, we conclude that the  
20 underestimation of melt in the CL region is partially due to the absence of westerly flow, but that this flow is adequately  
21 captured directly east of the AP (comprising the NL region).

22 Previous work has suggested that southwesterly föhn winds can result from gap flow (Elvidge et al. 2015),  
23 although we note that the southwesterly jets studied in this single campaign were typically cooler and moister than  
24 surrounding air, i.e. föhn flow produced from isentropic drawdown. While a version with a higher spatial resolution  
25 may potentially resolve topography sufficiently to include the initial intrusion of southwesterly gap flow, as well as  
26 northwesterly föhn flow, it may also further inhibit subsequent eastward flow when the hydrostatic assumption is  
27 retained. While a higher resolution of MAR v3.5.2 (used throughout this study) was not run due to computational  
28 constraints, the enhanced computational efficiency of a newer version of the MAR model (MAR v3.9, Section 2.1)  
29 could enable higher resolution runs over extended periods in the future.

30 To assess both the potential future application of MAR v3.9 over the AP as well as the effects of both vertical  
31 and horizontal resolution on modelled melt estimates, we compare melt occurrence and flow characteristics from Nov  
32 1, 2004 to March 31, 2005 between multiple versions of the MAR model. This included three versions of v3.9 (Section  
33 2.1), with two 5km and 10km resolution versions run with 24 vertical layers as well as an additional 10km resolution  
34 version with 32 vertical layers (10km V). The effect of the enhanced horizontal resolution on topography is substantial;  
35 the maximum height of the AP in the 5km version of the model is 2567m, but only 2340m in the 10km version. We  
36 find that the effect of increasing horizontal resolution to 5km is to limit the consistent strong melt production just  
37 leeward of the AP and that an increase in either horizontal resolution or vertical discretization limits eastward flow

1 (Fig. S12). As compared to AWS data at the Larsen IS AWS, all MAR configurations largely replicated the dominant  
2 southwesterly and northeasterly flow, although we found an enhanced bias for southeasterly flow with the enhanced-  
3 resolution versions of the model (Fig. S13). The effects of local topography on wind speed should be relatively limited  
4 as the region surrounding the Larsen ice shelf AWS station is relatively flat. Bedmap2 (Fretwell et al., 2013) reports  
5 mean (standard deviation) elevation values of 37.38m (0.53m) in the 5km surrounding the station and 37.37m (0.78m)  
6 in the 10km surrounding the station. The mean (standard deviation) values for slope are 0.015°(0.018°) at both  
7 resolutions. We conclude that a further increase in vertical discretization or horizontal resolution may potentially  
8 reduce flow towards the eastern edge of the Larsen C ice shelf, although the effect of better-resolved topography may  
9 allow more westerly flow in MAR to cross the AP.

10 As has been suggested by previous studies (Van Wessem et al., 2015a), the implementation of a non-hydrostatic  
11 model may improve the representation of westerly föhn flow over the eastern Larsen Ice Shelf (Hubert Gallée, personal  
12 communication). We note that previous work has suggested that a 5km non-hydrostatic model was still unable to  
13 capture föhn flow on the eastern portion of the Larsen C ice shelf (according to the AWS records), partially due to the  
14 inability to simulate southwesterly föhn jets, and that resolutions as high as 1.5km are required to simulate föhn flow  
15 accurately (Turton et al., 2017). However, recent work found that spatial resolutions as high as 2km in the non-  
16 hydrostatic WRF model were still unable to fully-resolve the steep surface temperature increases associated with the  
17 beginning of föhn flow (Bozkurt et al., 2018), suggesting that neither increased spatial resolution nor a non-hydrostatic  
18 model may be sufficient to fully capture the effects of föhn flow. We conclude from the main analysis that reduced  
19 eastward propagation of westerly winds may contribute to a lack of MAR melt in the CL region as compared to  
20 satellite estimates but that melt just east of the AP (the NL) region is represented with relative accuracy. This is further  
21 confirmed by the similarity between the spatial trends for melt occurrence as compared to QuikSCAT estimates. We  
22 remind the reader that previous work has suggested that föhn flow occurred only 20% of the time during a single melt  
23 season, and that substantial melt occurred in conditions where föhn winds are not present (King et al., 2017),  
24 suggesting that other factors contributing to surface melt energy may be equally, if not more, important for developing  
25 accurate melt estimates in RCMs. Because the current class of RCMs which employ the hydrostatic assumption, such  
26 as MAR, can be run for relatively long periods and contain relatively realistic representations of the snowpack, they  
27 can provide additional insights into the cumulative effects of surface melt over multiple seasons, with the  
28 understanding that the surface melt produced by föhn flow will likely be under-represented in the eastern regions of  
29 the Larsen C ice shelf.

30 Previous literature has pointed to several limitations in the remote sensing data sources used here which are either  
31 intrinsic to the satellite data itself or a product of the algorithm selected for melt detection (Ashcraft and Long, 2006).  
32 Products derived from QuikSCAT are limited in temporal resolution because the satellite passes daily, and may  
33 therefore ignore sporadic melt occurring at other times of the day. However, previous studies have compared total  
34 melt days from the QuikSCAT ft3 algorithm with a measure derived from surface temperature at seven automatic  
35 weather stations and shown a positive QuikSCAT ft3 bias compared to AWS (Steiner and Tedesco, 2014). Similarly,  
36 all PMW algorithms are limited by a relatively low resolution (25km) and twice-daily passes. Periods of melt  
37 occurrence have also been shown to be sensitive to the choice of algorithm (Tedesco 2009).

1           In future work, we will extend this model run to the 1982-2017 period as well as explore a higher-resolution run  
2 of a newer version of MAR, producing hourly outputs for the near-surface atmosphere. These runs will allow us to  
3 examine the frequency of föhn winds, the concurrent meltwater production and the effects of föhn-induced melt on  
4 the snowpack. We will use this multi-decadal record to examine interannual trends of föhn winds in all seasons as  
5 well as the cumulative effect of a changing regional climate on the snowpack of the NE basin.

6  
7

1 **References**

2 Abdalati, W., and Steffen K.: Passive Microwave-Derived Snow Melt Regions on the Greenland Ice Sheet,  
3 *Geophysical Research Letters.*, 22 (7), 787–790, doi:10.1029/95GL00433, 1995.

4  
5 Agosta, C., Amory, C., Kittel, C., Orsi, A., Favier, V., Gallée, H., van den Broeke, M. R., Lenaerts, J. T. M., van  
6 Wessem, J. M., and Fettweis, X.: Estimation of the Antarctic surface mass balance using MAR (1979–2015) and  
7 identification of dominant processes, *The Cryosphere Discuss.*, <https://doi.org/10.5194/tc-2018-76>, in review, 2018.

8  
9 Ahrens, C. Donald.: *Meteorology Today : An Introduction to Weather, Climate, and the Environment.* Eighth  
10 edition. Thomson/Brooks/Cole, Belmont, CA, 2007.

11  
12 Amory, C., Trouvilliez, A., Gallée, H., Favier, V., Naaim-Bouvet, F., Genthon, C., Agosta, C., Piard, L., and Bellot.  
13 H.: Comparison between Observed and Simulated Aeolian Snow Mass Fluxes in Adélie Land, East Antarctica., *The*  
14 *Cryosphere* 9 (4), 1373–83, doi:10.5194/tc-9-1373-2015, 2015.

15  
16 Ashcraft, I. S., and Long. D.G.: SeaWinds Views Greenland: In *Geoscience and Remote Sensing Symposium, 2000.*  
17 *Proceedings. IGARSS 2000. IEEE 2000 International*, 3,1131–1133, 2000.

18  
19 Ashcraft, I. S., and Long. D.G.: Comparison of Methods for Melt Detection over Greenland Using Active and  
20 Passive Microwave Measurements, *International Journal of Remote Sensing*, 27 (12), 2469–88,  
21 doi:10.1080/01431160500534465, 2006.

22  
23 Barrand, N. E., Vaughan, D. G., Steiner, N., Tedesco, M., Kuipers-Munneke, P. , Van den Broeke, M. R., and  
24 Hosking, J. S.: Trends in Antarctic Peninsula Surface Melting Conditions from Observations and Regional  
25 Climate Modeling, *Journal of Geophysical Research: Earth Surface*, 118 (1), 315–330,  
26 doi:10.1029/2012JF002559, 2013.

27  
28 Bell, R. E., Chu, W. Kingslake, J., Das, I., Tedesco, M., Tinto, K.J., Zappa, C.J., Frezzotti, M., Boghosian, A., and  
29 Lee.W.S.: Antarctic Ice Shelf Potentially Stabilized by Export of Meltwater in Surface River, *Nature*, 544 (7650),  
30 344–348. doi:10.1038/nature22048, 2017.

31  
32 Beran, D.W.: Large Amplitude Lee Waves and Chinook Winds, *Journal of Applied Meteorology*, 6 (5),865–877.  
33 doi:10.1175/1520-0450(1967)006<0865:LALWAC>2.0.CO;2., 1967.

34  
35 Bozkurt, D., Rondanelli, R., Marin, J.C. and Garreaud, R.: Foehn Event Triggered by an Atmospheric River Underlies  
36 Record-Setting Temperature Along Continental Antarctica, *Journal of Geophysical Research: Atmospheres*, 123(8),  
37 3871-92, <http://doi.org/10.1002/2017JD027796>, 2018.

1 Braithwaite, R. J.: On Glacier Energy Balance, Ablation, and Air Temperature, *Journal of Glaciology*, 27, 381–91,  
2 1981  
3

4 Brandt, R. E., and Warren, S.G.: Solar-Heating Rates and Temperature Profiles in Antarctic Snow and Ice, *Journal*  
5 *of Glaciology*, 39, 99–110. doi:10.1017/S0022143000015756, 1993.  
6

7 Brun, E, David, P., Sudul, M. and G Brunot, G.: A Numerical Model to Simulate Snow-Cover Stratigraphy for  
8 Operational Avalanche Forecasting, *Journal of Glaciology*, 38,13–22, 1992.  
9

10 Cape, M. R., Vernet, M., Skvarca, P., Marinsek, S., Scambos, T. and Domack, E.: Foehn Winds Link Climate-  
11 Driven Warming to Ice Shelf Evolution in Antarctica. *Journal of Geophysical Research: Atmospheres*, 120 (21) 11,  
12 37-11, doi:10.1002/2015JD023465, 2015.  
13

14 De Ridder, K., and Gallée, H.: Land Surface-Induced Regional Climate Change in Southern Israel, *Journal of*  
15 *Applied Meteorology*, 37 (11), 1470–1485, 1998.  
16

17 Dee, D. P., Uppala, S. M., Simmons, A. J., Berrisford, P., Poli, P., Kobayashi, S., Andrae, U. et al., The ERA-  
18 Interim Reanalysis: Configuration and Performance of the Data Assimilation System, *Quarterly Journal of*  
19 *the Royal Meteorological Society*, 137 (656), 553–597, doi:10.1002/qj.828, 2011.  
20

21 Drinkwater, M.R., and Liu, X.: Seasonal to Interannual Variability in Antarctic Sea-Ice Surface Melt, *IEEE*  
22 *Transactions on Geoscience and Remote Sensing*, 38(4), 1827–1842, doi:10.1109/36.851767, 2000.  
23

24 Dutra, E., Sandu, I., Balsamo, G., Beljaars, A., Freville, H., Vignon, E., and Brun. E.: Understanding the ECMWF  
25 Winter Surface Temperature Biases over Antarctica, *Technical Memorandum*, 762, 2015.  
26

27 Elvidge, A. D., Renfrew, I.A., King, J.C., Orr, A., Lachlan-Cope, T.A., Weeks, M. and Gray, S.L.: Foehn Jets over  
28 the Larsen C Ice Shelf, Antarctica, *Quarterly Journal of the Royal Meteorological Society*, 141(688), 698–  
29 713. doi:10.1002/qj.2382., 2015.  
30

31 Fettweis, X., Box, Jason E., Agosta, C., Amory, C., Kittel, C. and Gallée, H.: Reconstructions of the 1900-2015  
32 Greenland Ice Sheet Surface Mass Balance Using the Regional Climate MAR Model, *The Cryosphere Discussions*,  
33 November, 1–32. <https://doi.org/10.5194/tc-2016-268.>, 2016  
34

35 Fettweis, X., Franco, B., Tedesco, M., van Angelen, J.H., Lenaerts, J. T. M., Van den Broeke, M. R. and Gallée, H.:  
36 Estimating the Greenland Ice Sheet Surface Mass Balance Contribution to Future Sea Level Rise Using the  
37 Regional Atmospheric Climate Model MAR, *The Cryosphere* 7 (2), 469–489, doi:10.5194/tc-7-469-2013,

1 2013.

2

3 Fettweis, X, Gallée, H., Lefebvre, F., and Van Ypersele, J., Greenland Surface Mass Balance Simulated by a  
4 Regional Climate Model and Comparison with Satellite-Derived Data in 1990–1991, *Climate Dynamics*  
5 24 (6), 623–640, 2005.

6

7 Franco, B., Fettweis, X., Lang, C., and Erpicum, M.: Impact of Spatial Resolution on the Modelling of the  
8 Greenland Ice Sheet Surface Mass Balance between 1990–2010, Using the Regional Climate Model MAR,  
9 *The Cryosphere* 6 (3), 695–711. doi:10.5194/tc-6-695-2012, 2012.

10

11 Fretwell, P., Pritchard, H. D., Vaughan, D. G., Bamber, J. L., Barrand, N. E., Bell, R., Bianchi, C. et al.: Bedmap2:  
12 Improved Ice Bed, Surface and Thickness Datasets for Antarctica, *The Cryosphere*, 7 (1), 375–393,  
13 doi:10.5194/tc-7-375-2013, 2013.

14

15 Gallée, H., and Schayes, G.: Development of a Three-Dimensional Meso-Gamma Primitive Equation Model:  
16 Katabatic Winds Simulation in the Area of Terra Nova Bay, Antarctica, Belgian Science Policy Office, 1994.

17

18 Gallée, H., Trouvilliez, A., Agosta, C., Genthon, C., Favier, V., and Naaim-Bouvet, F.: Transport of Snow by the  
19 Wind: A Comparison Between Observations in Adélie Land, Antarctica, and Simulations Made with the Regional  
20 Climate Model MAR, *Boundary-Layer Meteor.*, 146 (1), 133–47, doi:10.1007/s10546-012-9764-z, 2013.

21

22 Gilbert, R. O.: *Statistical Methods for Environmental Pollution Monitoring*, Van Nostrand Reinhold Co., New York,  
23 NY, 1987.

24

25 Glasser, N. F., and Ted A. Scambos.: A Structural Glaciological Analysis of the 2002 Larsen B Ice-Shelf Collapse.,  
26 *J. of Glaciology* 54 (184):3–16, 2008

27

28 Greene, C. A., Gwyther, D. E., & Blankenship, D. D.: Antarctic Mapping Tools for Matlab. *Computers &*  
29 *Geosciences*. <http://dx.doi.org/10.1016/j.cageo.2016.08.003>., 2016.

30

31 Grosvenor, D. P., King, J.C., Choularton, T. W., and Lachlan-Cope, T.: Downslope Föhn Winds over the Antarctic  
32 Peninsula and Their Effect on the Larsen Ice Shelves. *Atmos. Chem. and Phys.*, 14 (18), 9481–9509.,  
33 <https://doi.org/10.5194/acp-14-9481-2014>., 2014.

34

35 Hock, R.: Glacier Melt: A Review of Processes and Their Modelling, *Progress in Phys. Geog.*, 29 (3), 362–91,  
36 doi:10.1191/0309133305pp453ra., 2005.

37

1 Hogg, A.E. and Gudmundsson, G.H.: Impacts of the Larsen-C Ice Shelf Calving Event., *Nature Climate Change* 7,  
2 August, 540, 2017.

3

4 Holland, P.R., Hugh F. J. Corr, H. D. Pritchard, Vaughan, D.G., Arthern, R.J., Jenkins, A., and Tedesco, M.: The Air  
5 Content of Larsen Ice Shelf, *Geoph. Res. Lett.*, 38 (10), doi:10.1029/2011GL047245, 2011.

6

7 Holmgren, B.: Climate and Energy Exchange on a Sub-Polar Ice Cap in Summer: Arctic Institute of North America  
8 Devon Island Expedition 1961-1963. *Acta Univ. Upsal. Abstracts of Uppsala Diss. from the Faculty of Science*, pt. 3.  
9 Meteorologiska Institutionen Uppsala Universitet., 1971.

10

11 Holton, J.: The General Circulation, in: *An Introduction to Dynamic Meteorology*, 4th ed., Elsevier Inc., 329–337,  
12 2004.

13

14 Hubbard, B., Luckman, A., Ashmore, D.W., Bevan, S., Kulesa, B., Kuipers-Munneke, P., Philippe, M. et al.: Massive  
15 Subsurface Ice Formed by Refreezing of Ice-Shelf Melt Ponds, *Nat. Comm.*, 7 (June), 11897.,  
16 doi:10.1038/ncomms11897, 2016.

17

18 Jansen, D., Kulesa, B., Sammonds, P. R., Luckman, A., King, E. C. and Glasser, N.F.: Present Stability of the Larsen  
19 C Ice Shelf, Antarctic Peninsula, *J. of Glac.*, 56 (198), 593–600, 2010.

20

21 Kingslake, J., Ely, J.C., Das, I., and Bell, R.E.: Widespread Movement of Meltwater onto and across Antarctic Ice  
22 Shelves, *Nature*, 544 (7650), 349–352, doi:10.1038/nature22049, 2017.

23

24 Koh, G., and Jordan, R.: Sub-Surface Melting in a Seasonal Snow Cover. *J. of Glaciology*, 41 (139): 474–482.  
25 doi:10.3189/S002214300003481X, 1995.

26

27 Kuipers-Munneke, P., van den Broeke, M. R., King, J. C., Gray, T., and Reijmer, C. H.: Near-Surface Climate and  
28 Surface Energy Budget of Larsen C Ice Shelf, Antarctic Peninsula, *The Cryosphere*, 6 (2), 353–363, doi:10.5194/tc-  
29 6-353-2012, 2012.

30

31 Kuipers Munneke, P., Picard, G., van den Broeke, M. R., Lenaerts, J. T. M., and van Meijgaard, E.: Insignificant  
32 Change in Antarctic Snowmelt Volume since 1979: Antarctic Snowmelt Volume, *Geoph. Res. Lett.*, 39(1),  
33 doi:10.1029/2011GL050207, 2012

34

35 Kuipers-Munneke, P., Ligtenberg, S.R.M., Van Den Broeke, M.R., and Vaughan, D.G.: Firn Air Depletion as a  
36 Precursor of Antarctic Ice-Shelf Collapse, *J. of Glaciology* 60 (220), 205–14, doi:10.3189/2014JoG13J183, 2014.

37

1 Kunz, L.B., and Long, D.G.: Melt Detection in Antarctic Ice Shelves Using Scatterometers and Microwave  
2 Radiometers. *IEEE Transactions on Geoscience and Remote Sensing*, 44 (9), 2461–  
3 69. <https://doi.org/10.1109/TGRS.2006.874138>, 2006.  
4  
5 Lenaerts, J. T. M., Lhermitte, S., Drews, R., Ligtenberg, S. R. M., Berger, S., Helm, V., Smeets, C. J. P. P. et al.:  
6 Meltwater Produced by Wind–albedo Interaction Stored in an East Antarctic Ice Shelf, *Nat. Clim. Change*, 7 (1), 58–  
7 62, doi:10.1038/nclimate3180, 2016.  
8  
9 Liston, G.E., Bruland, O., Winther, J., Elvehøy, H. and Sand, K.: Meltwater Production in Antarctic Blue-Ice Areas:  
10 Sensitivity to Changes in Atmospheric Forcing, *Polar Research*, 18 (2), 283–290, doi:10.3402/polar.v18i2.6586,  
11 1999a.  
12  
13 Liston, G. E., Winther, J., Bruland, O., Elvehøy, H. and Sand, K.: Below-Surface Ice Melt on the Coastal Antarctic  
14 Ice Sheet, *J. of Glaciology* 45 (150): 273–85. doi:10.3189/S002214300001775, 1999b.  
15  
16 Liu, H., Wang, L., and Jezek, K.C.: Spatiotemporal Variations of Snowmelt in Antarctica Derived from Satellite  
17 ScanningMultichannel Microwave Radiometer and Special Sensor Microwave Imager Data (1978–2004), *J. of*  
18 *Geoph. Res.: Earth Surface*, 111 (F1), doi:10.1029/2005JF000318, 2006.  
19  
20 Long, D.G., and Hicks, B.R.: Standard BYU QuikSCAT/SeaWinds Land/Ice Image Products, QuikScat Image  
21 Product Documentation, Brigham Young Univ., Provo, UT, 2000.  
22  
23 Luckman, A., Elvidge, A., Jansen, D., Kulesa, B., Kuipers-Munneke, P., King, J., and Barrand, N.E., Surface Melt  
24 and Ponding on Larsen C Ice Shelf and the Impact of Föhn Winds, *Antarctic Science*, 26 (6), 625–635,  
25 doi:10.1017/S0954102014000339, 2014.  
26  
27 MacAyeal, D.R., and Sergienko O.V.: The Flexural Dynamics of Melting Ice Shelves, *Annals of Glaciology*, 54 (63),  
28 1–10, doi:doi:10.3189/2013AoG63A256, 2013.  
29  
30 Mann, H. B.: Nonparametric Tests Against Trend, *Econometrica*, 13 (3), 245–259, doi:10.2307/1907187, 1945.  
31 Marshall, G. J.: Half-Century Seasonal Relationships between the Southern Annular Mode and Antarctic  
32 Temperatures, *Intl. Jour. of Clim.*, 27 (3), 373–83, doi:10.1002/joc.1407, 2007.  
33  
34 Marshall, G. J., Orr, A., Van Lipzig, N.P.M., and King, J.C.: The Impact of a Changing Southern Hemisphere Annular  
35 Mode on Antarctic Peninsula Summer Temperatures, *J. of Climate*, 19 (20), 5388–5404, 2006.  
36



1 Mercer, J. H.: West Antarctic Ice Sheet and CO<sub>2</sub> Greenhouse Effect: A Threat of Disaster, *Nature* ,271 (January),  
2 321–325, doi:10.1038/271321a0, 1978.  
3

4 Morris, E. M., and Vaughan, D.G.: Spatial and Temporal Variation of Surface Temperature on the Antarctic Peninsula  
5 And The Limit of Viability of Ice Shelves, In: *Antarctic Peninsula Climate Variability: Historical and*  
6 *Paleoenvironmental Perspectives*, American Geophysical Union, 61–68, doi:10.1029/AR079p0061, 2013.  
7

8 Mote, T., Anderson, M.R. , Kuivinen, K.C., and Rowe, M.C.: Passive Microwave-Derived Spatial and Temporal  
9 Variations of Summer Melt On the Greenland Ice Sheet, *International Symposium On Remote Sensing of Snow and*  
10 *Ice*, 17: 233–38, 1993.  
11

12 Ridley, J.: Surface Melting on Antarctic Peninsula Ice Shelves Detected by Passive Microwave Sensors, *Geoph.*  
13 *Res. Let.*, 20 (23), 2639–2642, doi:10.1029/93GL02611, 1993.  
14

15 Rott, H., Rack, W., Nagler, T., and Skvarca, P.: Climatically Induced Retreat and Collapse of Northern Larsen Ice  
16 Shelf, *Antarctic Peninsula*, *Annals of Glaciology* 27, 86–92, doi:10.1017/S0260305500017262, 1998.  
17

18 Rott, H., Rack, W., Skvarca, P., and De Angelis, H.: Northern Larsen Ice Shelf, *Antarctica: Further Retreat after*  
19 *Collapse*, *Annals of Glaciology* 34 (1), 277–82., doi: 10.3189/172756402781817716, 2002.  
20

21 Scambos, T. A.: Glacier Acceleration and Thinning after Ice Shelf Collapse in the Larsen B Embayment, *Antarctica*,  
22 *Geoph. Res. Let.*, 31 (18), doi:10.1029/2004GL020670, 2004.  
23

24 Scambos, T.A., Hulbe, C., Fahnestock, M., and Bohlander, J.: The Link between Climate Warming and Break-up of  
25 Ice Shelves in the Antarctic Peninsula, *J. Glaciology* 46 (154), 516–530,doi:10.3189/172756500781833043, 2000.  
26

27 Smith, L. C.: Melting of Small Arctic Ice Caps Observed from ERS Scatterometer Time Series, *Geoph. Res.*  
28 *Let.*, 30 (20), doi:10.1029/2003GL017641, 2003.  
29

30 Steiner, N., and Tedesco, M.: A Wavelet Melt Detection Algorithm Applied to Enhanced-Resolution Scatterometer  
31 Data over Antarctica (2000–2009),*The Cryosphere*, 8 (1), 25–40, doi:10.5194/tc-8-25-2014, 2014.  
32

33 Tedesco, M.: Assessment and Development of Snowmelt Retrieval Algorithms over Antarctica from K-Band  
34 Spaceborne Brightness Temperature (1979–2008), *Rem. Sen.of Env.* ,113 (5), 979–997,  
35 doi:10.1016/j.rse.2009.01.009, 2009.  
36

1 Tedesco, M., and Monaghan, A.J.: An Updated Antarctic Melt Record through 2009 and Its Linkages to High-Latitude  
2 and Tropical Climate Variability, *Geophysical Research Letters*, 36 (18), doi:10.1029/2009GL039186, 2009.  
3

4 Tedesco, M., Abdalati, W., and Zwally, H. J.: Persistent Surface Snowmelt over Antarctica (1987–2006) from 19.35  
5 GHz Brightness Temperatures, *Geoph. Res. Let.*, 34 (18), doi:10.1029/2007GL031199, 2007.  
6

7 Tedesco, M.: Snowmelt Detection over the Greenland Ice Sheet from SSM/I Brightness Temperature Daily Variations,  
8 *Geoph. Res. Let.*, 34 (2), doi:10.1029/2006gl028466, 2007.  
9

10 Torinesi, O., Fily, M., and Genthon, C.: Variability and Trends of the Summer Melt Period of Antarctic Ice Margins  
11 since 1980 from Microwave Sensors, *J. of Climate*, 16 (7), 1047–1060, 2003.  
12

13 Trusel, L. D., Frey, K. E., and Das, S. B.: Antarctic Surface Melting Dynamics: Enhanced Perspectives from Radar  
14 Scatterometer Data, *J. of Geoph. Res.*, 117 (F2), doi:10.1029/2011JF002126, 2012.  
15

16 Trusel, L.D., Frey, K.D., Das, S.B., Kuipers-Munneke, P., and Van den Broeke, M.R.: Satellite-Based Estimates of  
17 Antarctic Surface Meltwater Fluxes, *Geoph. Res. Let.*, 40 (23): 6148–6153. doi:10.1002/2013GL058138, 2013.  
18

19 Turner, J., Lu, H., White, I., King, J.C., Phillips, T., Hosking, J.S., Bracegirdle, T.J., Marshall, G.J., Mulvaney, R., and  
20 Deb, P.: Absence of 21st Century Warming on Antarctic Peninsula Consistent with Natural Variability, *Nature*, 535  
21 (7612), 411–415, doi:10.1038/nature18645, 2016.  
22

23 Turner, J., Colwell, S.R., Marshall, G.J., Lachlan-Cope, T.A., Carleton, A.M., Jones, P.D., Lagun, V., Reid, P.A., and  
24 Iagovkina, S.: Antarctic Climate Change during the Last 50 Years, *Int. Journ. of Clim*, 25 (3), 279–294,  
25 doi:10.1002/joc.1130, 2005.  
26

27 Turton, J. V., Kirchgassner, A., Ross, A. N., and King, J. C.: Does High-Resolution Modelling Improve the Spatial  
28 Analysis of Föhn Flow over the Larsen C Ice Shelf?, *Weather* 72 (7), 192–96. <https://doi.org/10.1002/wea.3028>, 2017.  
29

30 Ulaby, F.T., and Stiles, W.H.: The Active and Passive Microwave Response to Snow Parameters: 2. Water Equivalent  
31 of Dry Snow, *J. of Geoph. Res.: Oceans*, 85 (C2), 1045–1049, doi:10.1029/JC085iC02p01045, 1980.  
32

33 Van Den Broeke, M. R., and Van Lipzig, N.P.M.: Response of Wintertime Antarctic Temperatures to the Antarctic  
34 Oscillation: Results of a Regional Climate Model, in: *Antarctic Peninsula Climate Variability: Historical and*  
35 *Paleoenvironmental Perspectives*, American Geophysical Union, 43–58, 2003.  
36

37 Van Den Broeke, M. R.: Strong Surface Melting Preceded Collapse of Antarctic Peninsula Ice Shelf, *Geoph. Res.*

1 Let., 32 (12), doi:10.1029/2005GL023247, 2005.

2

3 van der Veen, C.J.: Fracture Mechanics Approach to Penetration of Surface Crevasses on Glaciers, *Cold Regions*  
4 *Science and Technology* 27 (1): 31–47. doi:10.1016/S0165-232X(97)00022-0, 1998.

5

6 Van Lipzig, N. P. M.: Precipitation, Sublimation, and Snow Drift in the Antarctic Peninsula Region from a Regional  
7 Atmospheric Model, *J. of Geoph. Res.*, 109 (D24), doi:10.1029/2004JD004701, 2004.

8

9 Van Meijgaard, E., Van Ulf, L. H., Van de Berg, W. J., Bosveld, F. C., Van den Hurk, B., Lenderink, G., and  
10 Siebesma, A.P.: The KNMI Regional Atmospheric Climate Model RACMO Version 2.1., Koninklijk Nederlands  
11 Meteorologisch Instituut., <http://a.knmi2.nl/knmi-library/knmipubTR/TR302.pdf>, 2008.

12

13 Van Wessem, J. M., Ligtenberg, S. R. M., Reijmer, C. H., van de Berg, W. J., van den Broeke, M. R., Barrand, N.  
14 E., Thomas, E. R.: The Modelled Surface Mass Balance of the Antarctic Peninsula at 5.5 Km Horizontal  
15 Resolution, *The Cryosphere Discussions*, 9 (5), 5097–5136, doi:10.5194/tcd-9-5097-2015, 2015a.

16

17 Van Wessem, J.M., Reijmer, C.H., van de Berg, W.J., van den Broeke, M.R., Cook, A.J., van Ulf, L.H., and van  
18 Meijgaard, E.: Temperature and Wind Climate of the Antarctic Peninsula as Simulated by a High-Resolution Regional  
19 Atmospheric Climate Model, *Journal of Climate* 28 (18), 7306–26. <https://doi.org/10.1175/JCLI-D-15-0060.1>, 2015b.

20

21 Van Wessem, J.M., van de Berg, W.J., Noël, B. P. Y., van Meijgaard, E., Amory, C., Birnbaum, G., Jakobs, C.L.:  
22 Modelling the Climate and Surface Mass Balance of Polar Ice Sheets Using RACMO2 – Part 2: Antarctica (1979–  
23 2016).” *The Cryosphere* 12 (4), 1479–98, <https://doi.org/10.5194/tc-12-1479-2018>, 2018.

24

25 Vaughan, D. G., and Doake, C. S. M.: Recent Atmospheric Warming and Retreat of Ice Shelves on the Antarctic  
26 Peninsula, *Nature*, 379 (6563), 328–31, doi:10.1038/379328a0, 1996.

27

28 Vaughan, D. G.: Recent Trends in Melting Conditions on the Antarctic Peninsula and Their Implications for Ice-Sheet  
29 Mass Balance and Sea Level, *Arctic, Antarctic, and Alpine Research*, 38 (1), 147–152, 2006.

30

31 Vaughan, D. G.: West Antarctic Ice Sheet Collapse—the Fall and Rise of a Paradigm, *Climatic Change*, 91 (1–2), 65–  
32 79, 2008.

33

34 Wallace, J. M., and Hobbs, P.V.: Hypsometric Equation, in: *Atmospheric Science: An Introductory Survey*,  
35 Academic Press, Cambridge, MA, 55–57, 1977.

36

37 Weertman, J.: Can a Water-Filled Crevasse Reach the Bottom Surface of a Glacier., *IASH Publ* 95, 139–145., 1973

38

1 Wiesenekker, J., Kuipers Munneke, P., van den Broeke, M., and Smeets, C.: A Multidecadal Analysis of Föhn  
2 Winds over Larsen C Ice Shelf from a Combination of Observations and Modeling: *Atmosphere* 9 (5): 172.  
3 <https://doi.org/10.3390/atmos9050172>, 2018.  
4  
5 Wilks, D.S.: *Statistical Methods in the Atmospheric Sciences: An Introduction*. International Geophysics, Elsevier  
6 Science, Amsterdam, Netherlands, 1995.  
7  
8 Wismann, V.: Monitoring of Seasonal Snowmelt on Greenland with ERS Scatterometer Data, *IEEE Transactions on*  
9 *Geoscience and Remote Sensing*, 38 (4), 1821–1826, doi:10.1109/36.851766, 2000.  
10  
11 Zwally, H. J., Giovinetto, M. B., Beckley, M. A., and Saba, J. L.: *Antarctic and Greenland Drainage Systems*, GSFC  
12 *Cryospheric Sciences Laboratory*, 2012.  
13  
14 Zwally, H. Jay, Abdalati, W., Herring T., Larson, K., Saba, J., and Steffen, K.: Surface Melt-Induced Acceleration of  
15 *Greenland Ice-Sheet Flow*, *Science*, 297 (5579), 218–222., 2002.  
16  
17 Zwally, H. J., and Fiegles, S.: *Extent and Duration of Antarctic Surface Melting*, *J. of Glaciology*, 40, 463–476, 1994.  
18

1

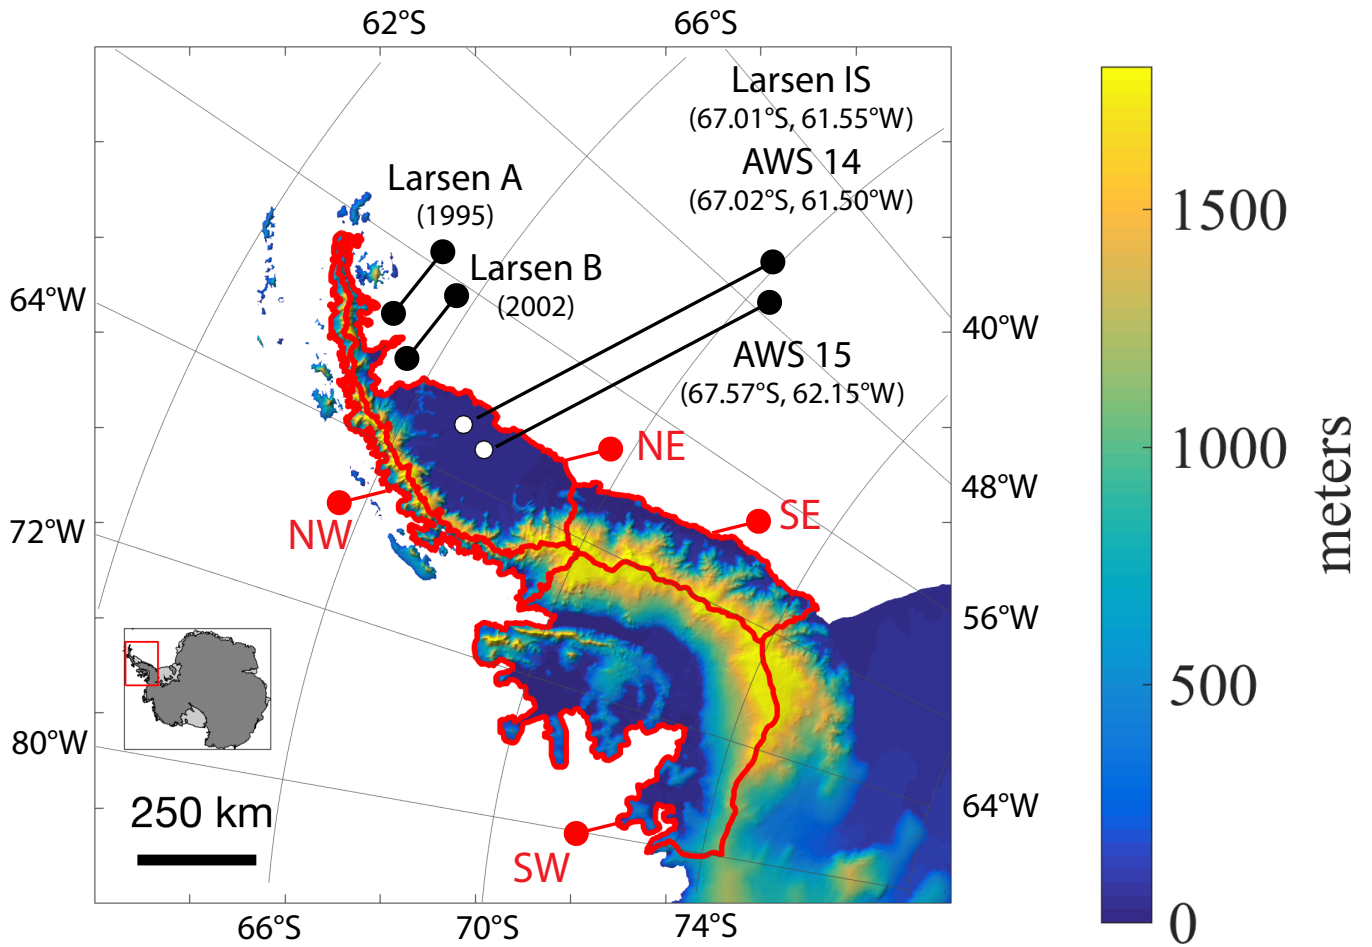

3  
4

5 **Figure 1: Full MAR domain showing topographic relief from bedmap2 (<https://www.bas.ac.uk/project/bedmap-2>) at 1km,**  
6 **former ice shelves with dates of collapse, locations of automatic weather stations (Larsen IS and AWS 14 stations are located**  
7 **within the same MAR gridcell) and basins corresponding to SW (basin 24) NW (basin 25) NE (basin 26), SE (basin 27)**  
8 **from Zwally, et. al. 2012**

9  
10  
11  
12

| <b>Abbreviation</b>                                                               | <b>Definition</b>                                                                                                                             |
|-----------------------------------------------------------------------------------|-----------------------------------------------------------------------------------------------------------------------------------------------|
| <b>MAR model : criteria for melt occurrence (Section 2.1)</b>                     |                                                                                                                                               |
| LWC <sub>0.4</sub>                                                                | liquid water content in the first meter is greater than 0.4 mm we (water equivalent)                                                          |
| MF <sub>0.4</sub>                                                                 | total meltwater production over the day exceeds 0.4 mmwe                                                                                      |
| <b>Passive microwave : criteria for melt occurrence (Section 2.2.2)</b>           |                                                                                                                                               |
| zwa                                                                               | threshold based on winter mean temperature brightness, Zwally and Fiegles, 1994                                                               |
| ALA                                                                               | threshold based on winter mean temperature brightness, Ashcroft and Long, 2006                                                                |
| 240                                                                               | fixed threshold method (Tedesco, 2007)                                                                                                        |
| PMWAll                                                                            | Condition when zwa, ALA, 240 all report melt occurrence                                                                                       |
| <b>Active microwave (QuikSCAT) : criteria for melt occurrence (Section 2.2.1)</b> |                                                                                                                                               |
| QuikSCAT ft3                                                                      | threshold based on winter mean backscatter (Steiner and Tedesco, 2014)                                                                        |
| <b>Observation-based regions of high melt occurrence (Section 3.2)</b>            |                                                                                                                                               |
| CL region                                                                         | high melt at the center-east of the Larsen C ice shelf, melt days exceeding 1 std dev of PMWAll mean melt occurrence                          |
| NL region                                                                         | high melt in the north and west of the NE basin, consisting of the NE basin above the mean latitude of CL region which excludes the CL region |
| <b>Conditions for melt occurrence (Section 4.2)</b>                               |                                                                                                                                               |
| PMWEx                                                                             | PMWAll reports melt occurrence but MAR does not                                                                                               |
| QSEx                                                                              | QuikSCAT ft3 reports melt occurrence but MAR does not                                                                                         |
|                                                                                   |                                                                                                                                               |
| MAR-R                                                                             | criteria when MAR data is used only when AWS data is available                                                                                |
|                                                                                   |                                                                                                                                               |
|                                                                                   |                                                                                                                                               |

1 **Table 1: Abbreviations used throughout text**

1  
2

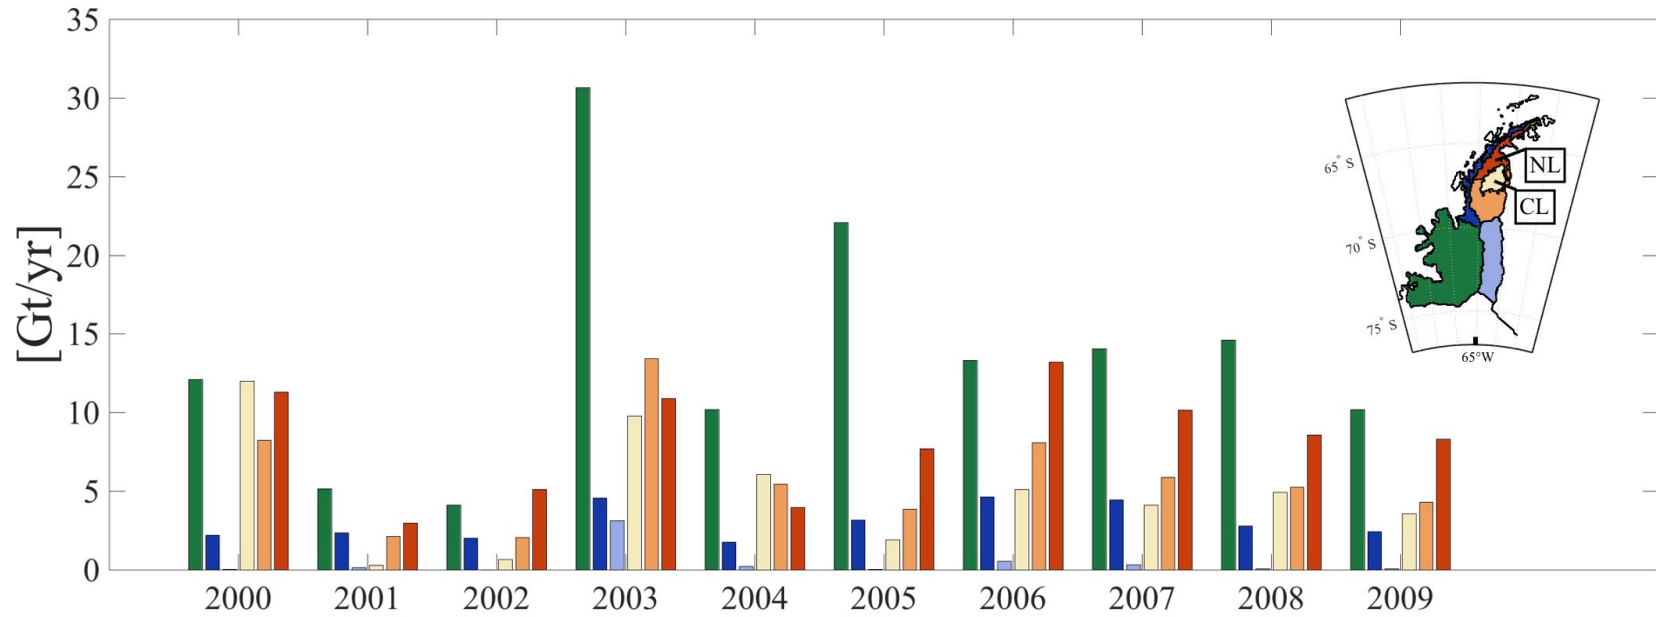

3  
4  
5  
6  
7  
8

**Figure 2 Annual meltwater production from MAR [Gt/yr] shown for masks shown in inset ('2001' corresponds to meltwater production from July 2000- June 2001. NW, SW, SE basins are shown as in Fig. 1. NE basin is divided into the NL mask, the CL mask and the remaining portion of the NE basin (NE - (CL+NL)). The CL and NL masks are described in text.**

1

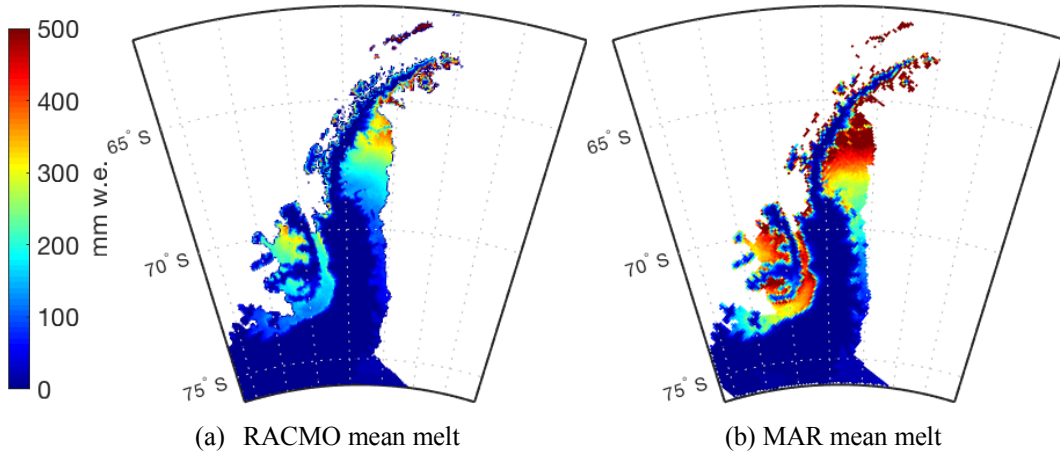

2

3

4

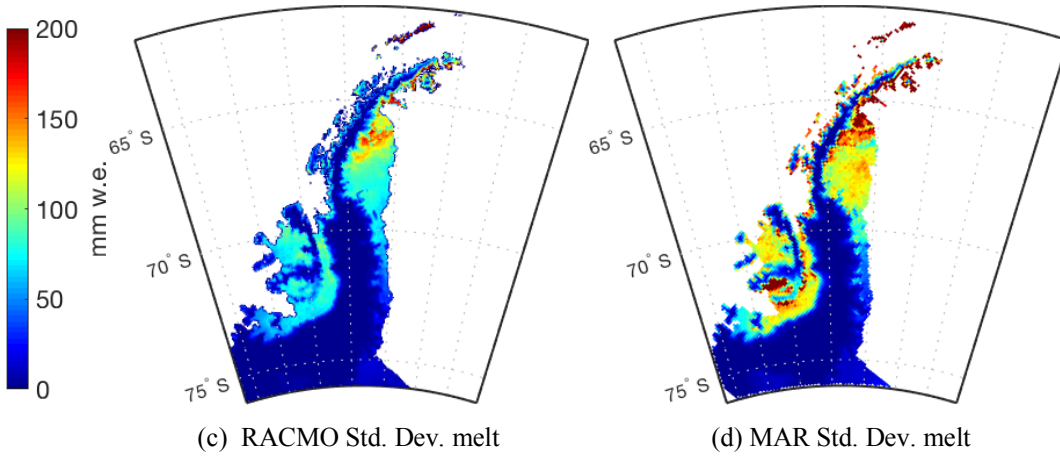

5

6

7

8

9

10

**Figure 3 Meltwater production (2000-2009). RACMO2.3p2 at 5.5 km resolution, mean annual meltwater production (a) and standard deviation (c) and MAR v. 3.5.2 at a 10km resolution, mean annual meltwater production (b) and standard deviation (d)**

11

12

13

14

15

16

17

18

19

20

21

22



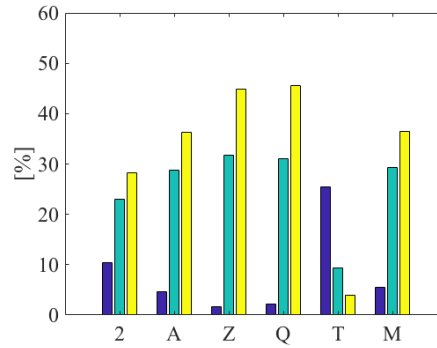

(a) Melt Occurrence at the Larsen Ice Shelf AWS Threshold = 0.4 mm w.e.

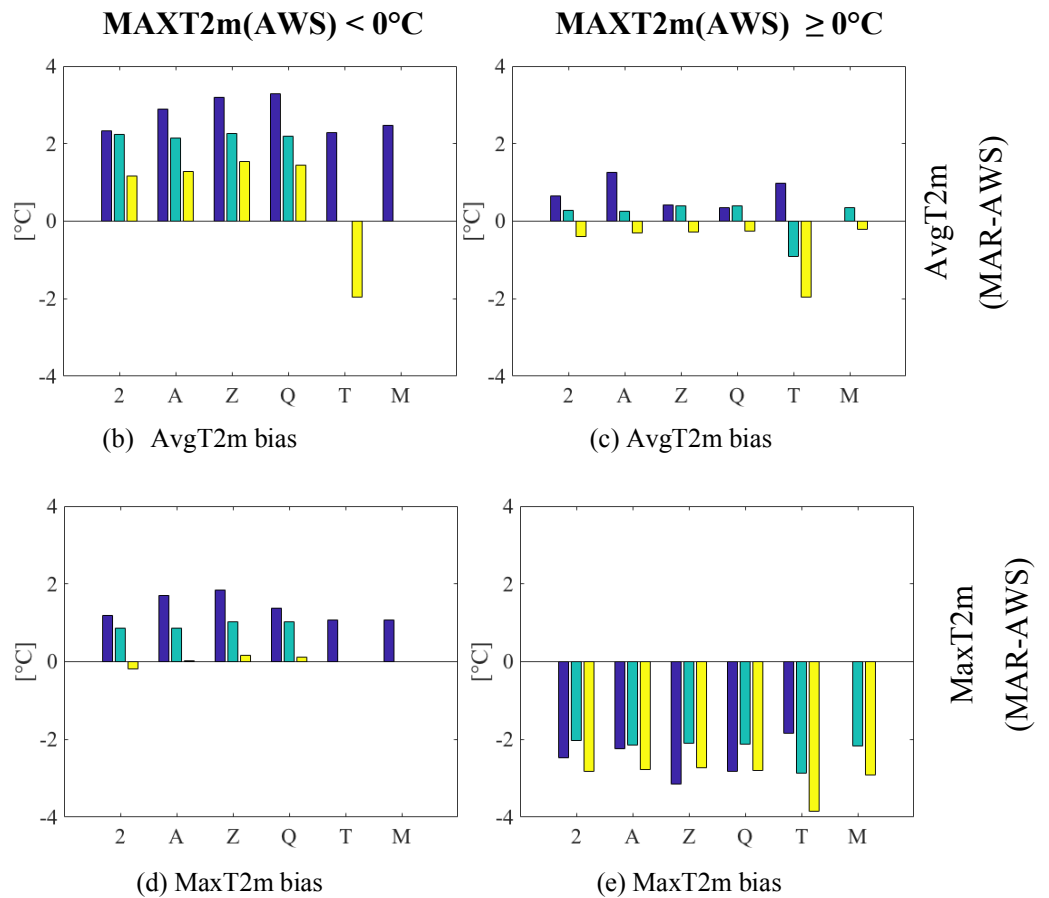

**Data Sources:**

Satellite

- 2 PMW 240
- A PMW ALA
- Z PMW zwa
- Q QuikSCAT

AWS-based

- T AvgT2m > 0°C
- M MaxT2m > 0°C

**Melt Occurrence:**

- MAR Only
- MAR & Obs
- Obs. Only

Figure 4 Melt Occurrence and Temperature Biases at the Larsen Ice Shelf AWS Station. Percentage of total days (DJF, 2001-2010) showing melt occurrence from observational sources as compared to MAR v3.5.3 melt occurrence using the  $MF_{0.4}$  metric (a) Temperature biases (MAR-AWS) for AvgT2m (b,c) and MaxT2m (d,e) when Max T2m is less than 0°C (b,d) or greater than 0°C (c,e)

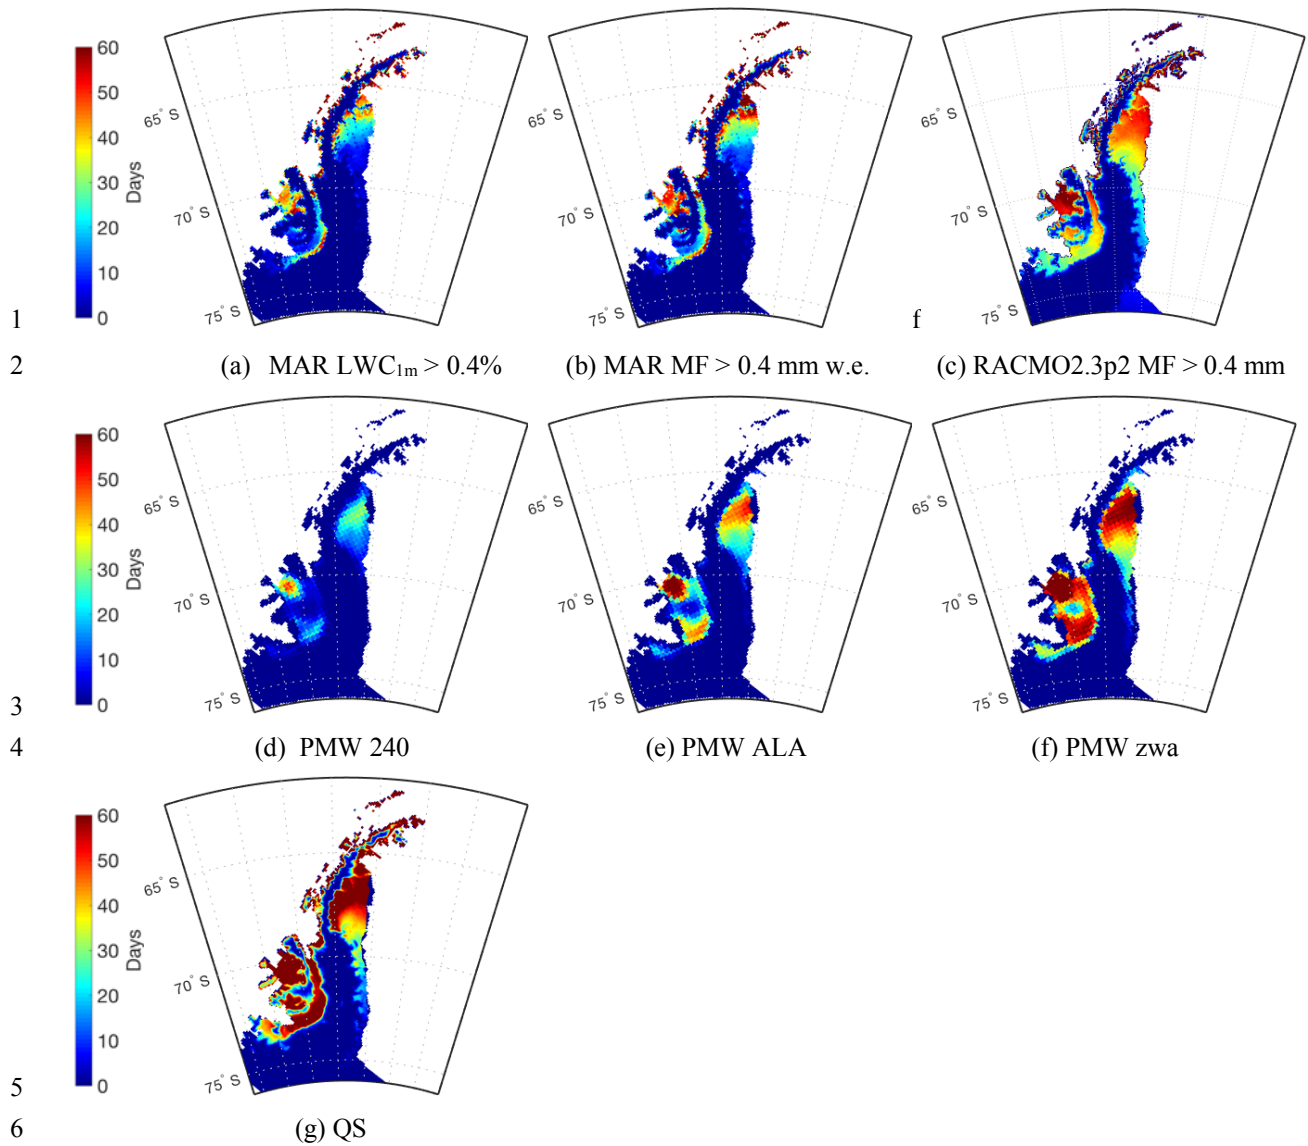

8 **Figure 5** Average number of melt days (2000-2009) from multiple sources (a) MAR, Liquid Water Content  $> 0.4\%$  for three  
 9 consecutive days. (b) MAR Total Melt Flux  $> 0.4$  mm w.e. for 1 day or more (c) RACMO2.3p2, Melt Flux  $> 0.4$  mm w.e.  
 10 Satellite-based metrics include (d) PMW 240 algorithm (e) PMW ALA (f) PMW Zwa (g) QuikSCAT. All satellite-based  
 11 estimates include a melt day only when part of a sustained three-day period of melt.

12  
13  
14  
15

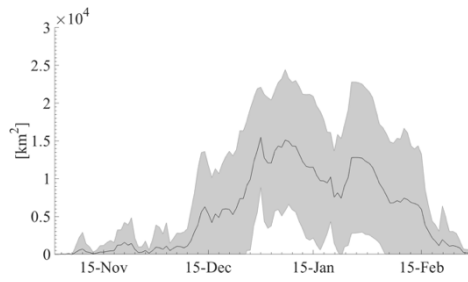

(a) MAR melt climatology

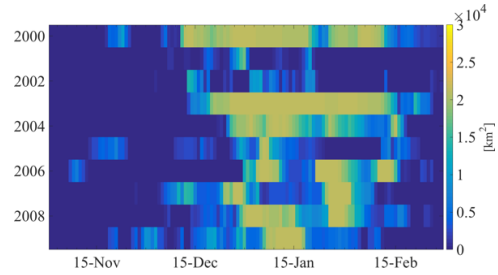

(b) MAR interannual

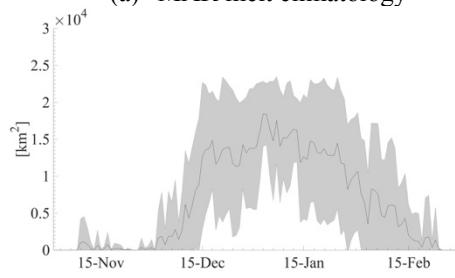

(c) PMW All melt climatology

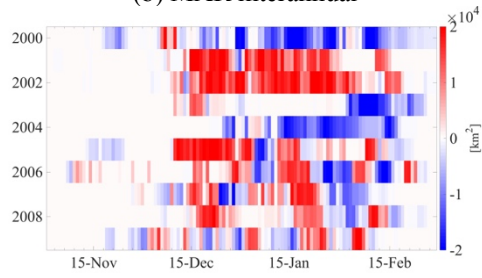

(d) PMW All - MAR interannual

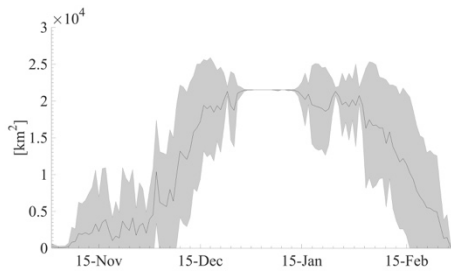

(e) zwa melt climatology

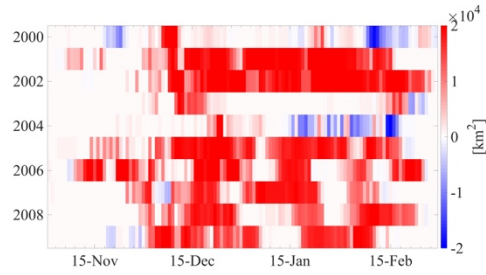

(f) zwa - MAR interannual

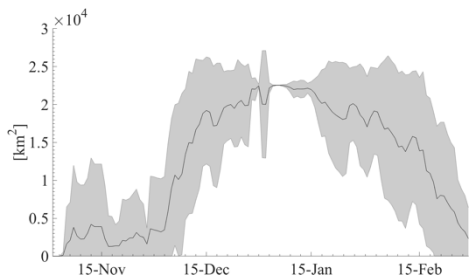

(g) QuikSCAT ft3 melt climatology

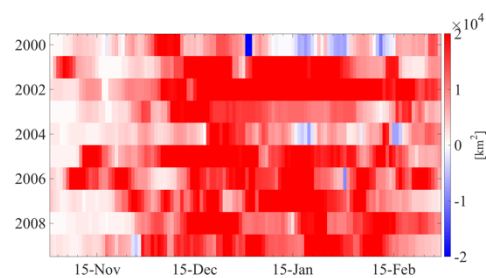

(h) QuikSCAT ft3 - MAR interannual

Figure 6 CL-region, described in text and shown in inset in for (a), average and inter-annual melt occurrence in MAR, PMW and QuikSCAT data. (a) MF0.4 melt extent climatology with one standard deviation shown in grey envelope (b) melt extent for MF0.4 from 1999-2009 (c) melt climatology PMW All (d) interannual difference melt extent PMW All - MAR (e) melt climatology PMW zwa (f) interannual difference in melt extent PMW zwa - MAR (g) melt climatology QuikSCAT ft3 (h) interannual difference in melt extent QuikSCAT ft3 - MAR

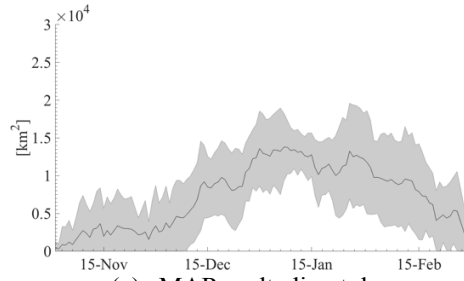

(a) MAR melt climatology

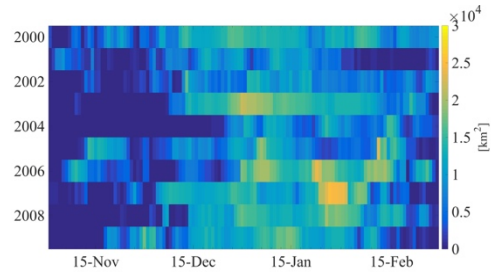

(b) MAR interannual

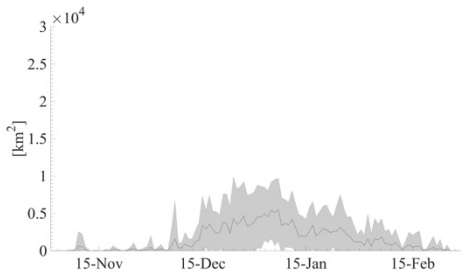

(c) PMWAll melt climatology

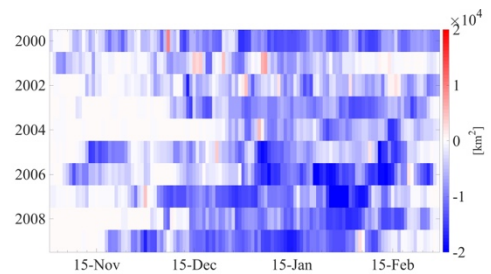

(d) PMWAll - MAR interannual

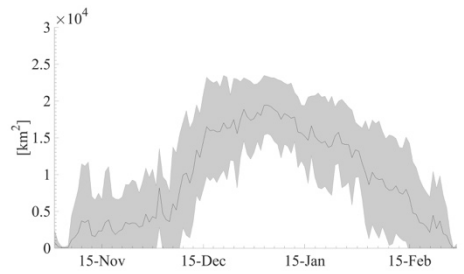

(e) zwa melt climatology

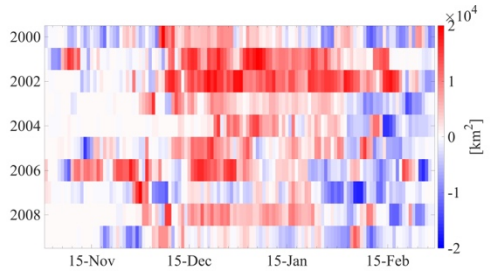

(f) zwa - MAR interannual

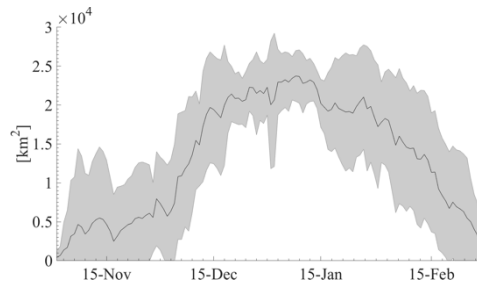

(g) QuikSCAT ft3 melt climatology

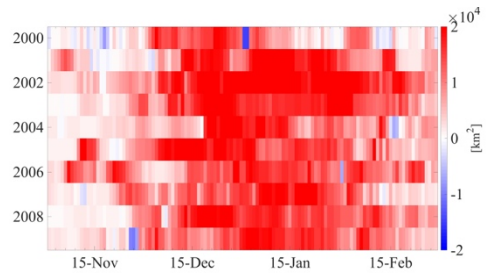

(h) QuikSCAT ft3 - MAR interannual

Figure 7 NL-region, described in text and shown inset in (c), average and inter-annual melt occurrence in MAR, PMW and QuikSCAT data. (a) MF<sub>0.4</sub> melt extent climatology with one standard deviation shown in grey envelope (b) melt extent for MF<sub>0.4</sub> from 1999-2009 (c) melt climatology PMW All (d) interannual difference melt extent PMWAll - MAR (e) melt climatology PMWzwa (f) interannual difference in melt extent PMWzwa - MAR (g) melt climatology QuikSCAT ft3 (h) interannual difference in melt extent QuikSCAT ft3 - MAR

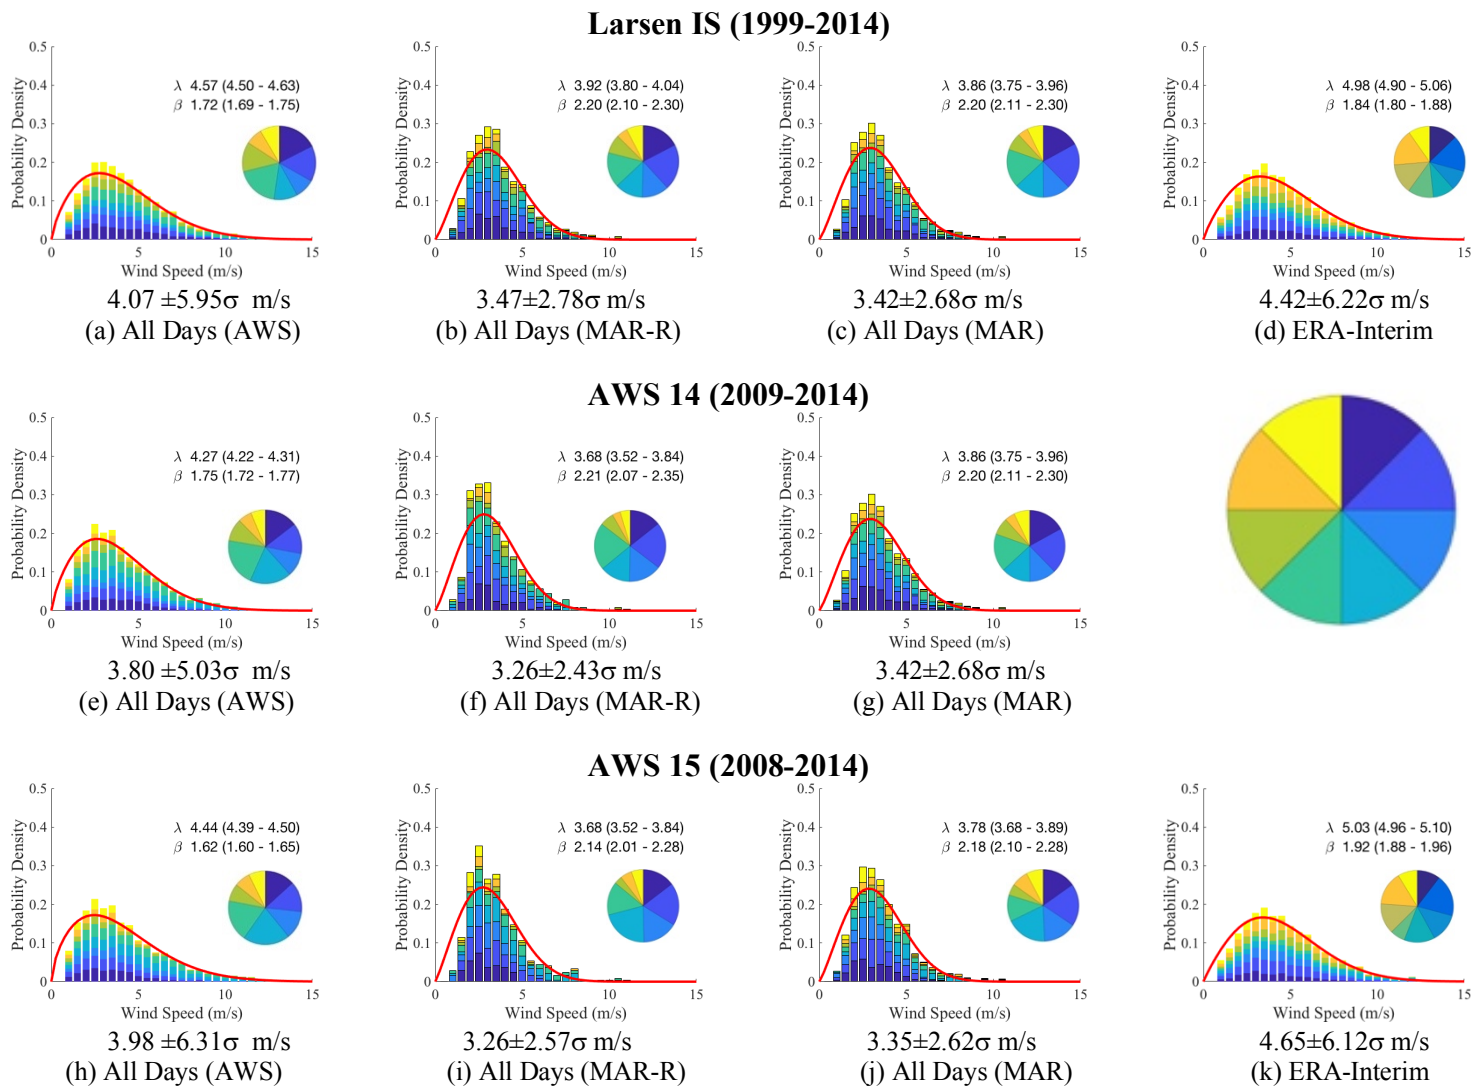

**Figure 8** Probability distribution (y-axis) of summer (DJF) wind speeds (x-axis) and direction proportions inset. Wind directions corresponding to colors in 45° increments shown right of (g). Curve shows Weibull curve shape ( $\beta$ ) and scale ( $\lambda$ , m/s). Datasets for AWS (col 1), MAR-R (col 2), MAR from 1999-2014 period (col 3) and ERA-Interim for the AWS-restricted period (col 4). Shown for station Larsen IS ( row1, a,b,c,d), AWS 14 (row 2, e,f,g), AWS 15 (row 3, h,i,j,k) Values below figures are expected values.

|                                                | NE<br>(0°-90°) | SE<br>(90°-180°) | SW<br>(180°-270°) | NW<br>(270°-360°) |
|------------------------------------------------|----------------|------------------|-------------------|-------------------|
| <b>DJF All Days</b>                            |                |                  |                   |                   |
| <b>MAR shows wind direction</b>                |                |                  |                   |                   |
| MAR percentage                                 | 39.0%          | 23.5%            | 23.2%             | 14.1%             |
| MAR expected wind speed [m/s]                  | 3.48(±2.46)    | 3.47(±2.62)      | 4.46(±4.44)       | 3.66(±4.69)       |
| AWS expected wind speed [m/s]                  | 3.79(±4.35)    | 4.19(±6.01)      | 5.35(±9.16)       | 4.00(±7.63)       |
| <b>AWS shows wind direction</b>                |                |                  |                   |                   |
| AWS percentage                                 | 34.3%          | 17.4%            | 28.9%             | 19.3%             |
| MAR expected wind speed [m/s]                  | 3.47(±2.49)    | 3.49(±2.14)      | 3.86(±3.54)       | 6.40(±10.14)      |
| AWS expected wind speed [m/s]                  | 3.96(±4.65)    | 3.77(±4.97)      | 4.77(±7.89)       | 6.70(±16.94)      |
| <b>Temp. biases (MAR-AWS)</b>                  |                |                  |                   |                   |
| Avg T2m                                        | 0.68°C         | 0.65°C           | 0.94°C            | 0.72°C            |
| Max T2m                                        | -2.16°C        | -1.40°C          | -1.19°C           | -2.35°C           |
| <b>Temp. bias where T2m &gt; 0°C (MAR-AWS)</b> |                |                  |                   |                   |
| Avg T2m                                        | -1.36°C        | -1.50°C          | -1.06°C           | -1.06°C           |
| Max T2m                                        | -2.96°C        | -3.05°C          | -2.33°C           | -2.75°C           |
|                                                |                |                  |                   |                   |
| <b>DJF, MAR reports melt</b>                   |                |                  |                   |                   |
| MAR wind direction percentage                  | 34.7%          | 27.6%            | 24.5%             | 13.2%             |
| AWS wind direction percentage                  | 35.2%          | 13.9%            | 25.6%             | 25.2%             |
| <b>Temp. biases (MAR-AWS)</b>                  |                |                  |                   |                   |
| Avg T2m                                        | 0.77°C         | 0.56°C           | 1.05°C            | 0.52°C            |
| Max T2m                                        | -2.11°C        | -2.20°C          | -0.95°C           | -1.43°C           |
| <b>Temp. bias where T2m &gt; 0°C (MAR-AWS)</b> |                |                  |                   |                   |
| Avg T2m                                        | -0.93°C        | -1.13°C          | -0.53°C           | -0.98°C           |
| Max T2m                                        | -2.57°C        | -3.16°C          | -1.66C            | -1.61°C           |

**Table 2: Proportions for wind direction and associated temperature biases at the Larsen Ice Shelf AWS station from 2000-2009 restricted to the summer season (DJF)**

1  
2

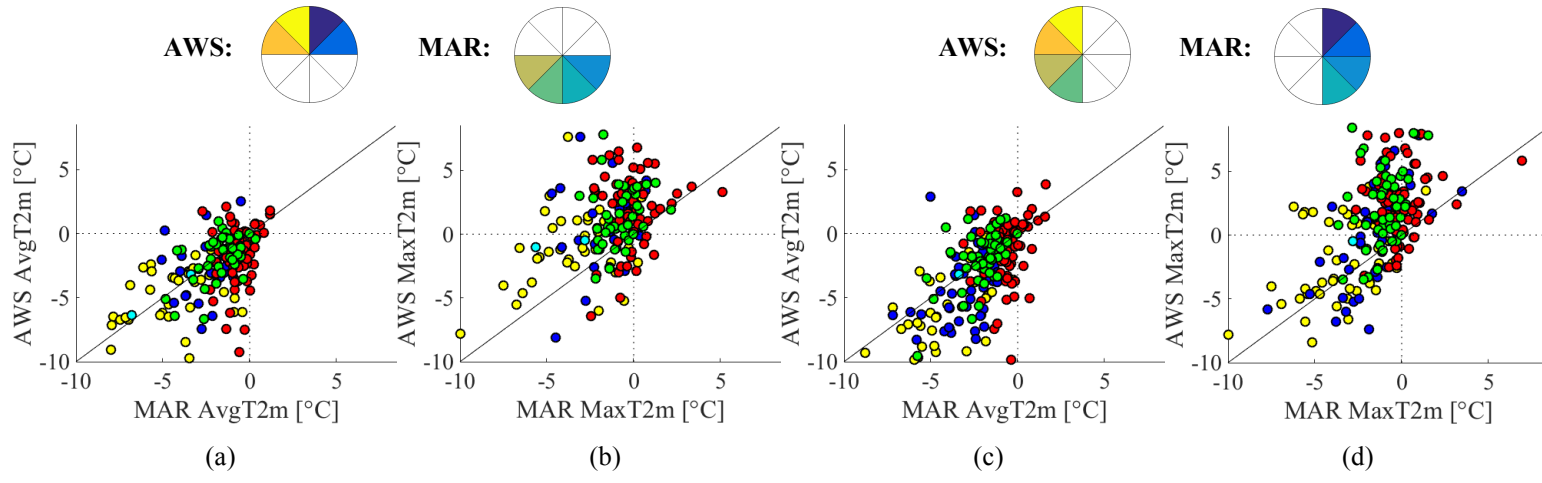

3  
4  
5  
6  
7

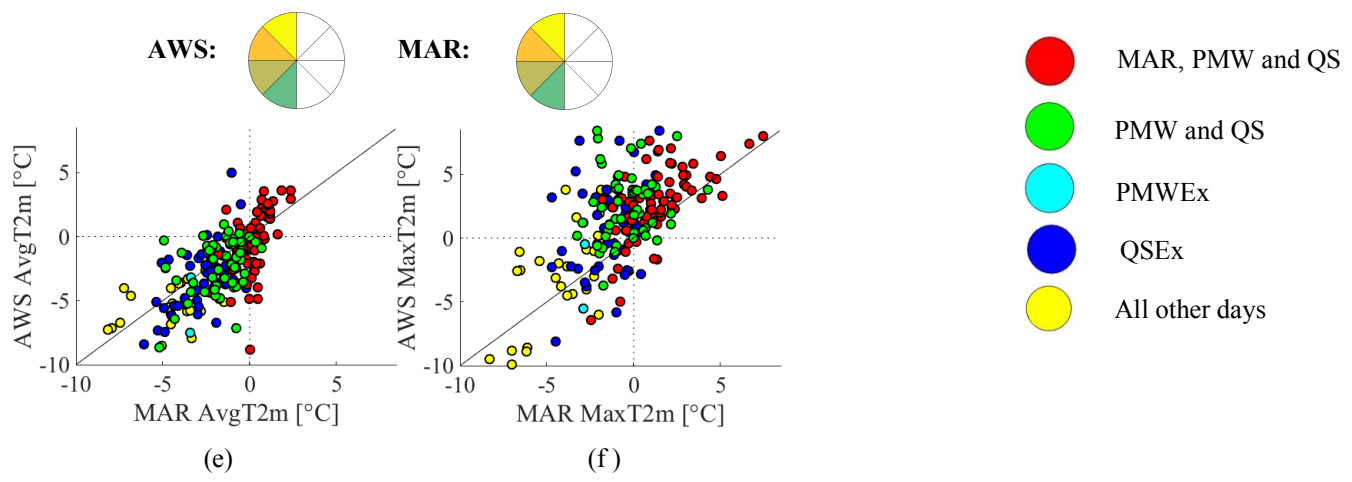

8  
9  
10  
11  
12  
13  
14  
15

**Figure 9** MAR vs AWS temperatures at the Larsen Ice Shelf AWS station for DJF from 2001-2009 for melt occurrence criteria as shown bottom-right and described in text. Wind direction biases are shown for when northerly AWS flow is reported as southerly in MAR (a) AvgT2m (b) MaxT2m, when westerly AWS flow is reported as easterly in MAR (c) AvgT2m (d) MaxT2 and when AWS and MAR both report westerly flow (e) AvgT2m (f) MaxT2m.

1  
2  
3
